# Supplementary material
Source: publisher figshare collection journal article supplement (https://acs.figshare.com/ndownloader/files/6893009)
Supplement: Supplementary file 1 [file 6893009]

## SUPPORTING INFORMATION – APPENDIX

### Coarse-Grained Simulations Complemented by Atomistic Molecular Dynamics Provide New Insights into Folding of Human Telomeric G-Quadruplexes

Petr Stadlbauer<sup>1,2</sup>, Liuba Mazzanti<sup>3</sup>, Tristan Cragolini<sup>4</sup>, David J. Wales<sup>4</sup>, Philippe Derreumaux<sup>3</sup>,  
Samuela Pasquali<sup>3,\*</sup> and Jiří Šponer<sup>1,\*</sup>

<sup>1</sup> Institute of Biophysics, Academy of Sciences of the Czech Republic, Královopolská 135, 612 65 Brno, Czech Republic

<sup>2</sup> Regional Centre of Advanced Technologies and Materials, Departments of Physical Chemistry, Faculty of Science, Palacký University, 17. listopadu 1192/12, 771 46 Olomouc, Czech Republic

<sup>3</sup> Laboratoire de Biochimie Théorique, IBPC, CNRS UPR9080, Université Sorbonne Paris Cité, Paris Diderot, 13 rue Pierre et Marie Curie, 75005 Paris, France

<sup>4</sup> Department of Chemistry, Cambridge University, Lensfield Road, Cambridge, CB2, 1EW, UK

This appendix contains graphs of time evolution of various order parameters (collective variables, CVs) for all MD simulations in this study (see Main text Table 1 for the list of simulations).

#### FIGURES

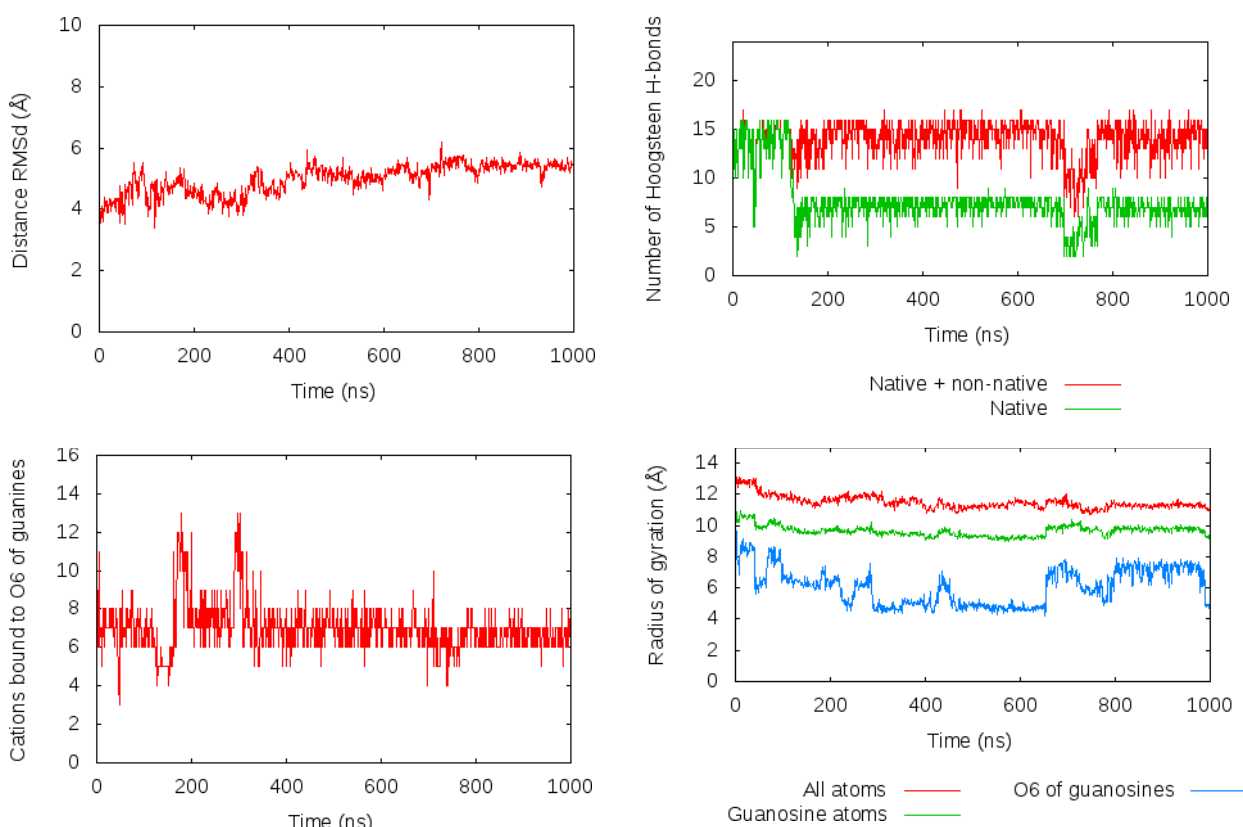

**Figure SA1.** Evolution of seven CVs in the simulation 1KF1-A. Top left: C4' distance RMSd with respect to the native structure 1KF1. Top right: Total number of native *c*WH G-G hydrogen bonds and total number of all *c*WH G-G hydrogen bonds. Bottom left: Total number of cation-G(O6) contacts. Bottom right: Radius of gyration of all atoms, all guanosine atoms, and G(O6) atoms only.

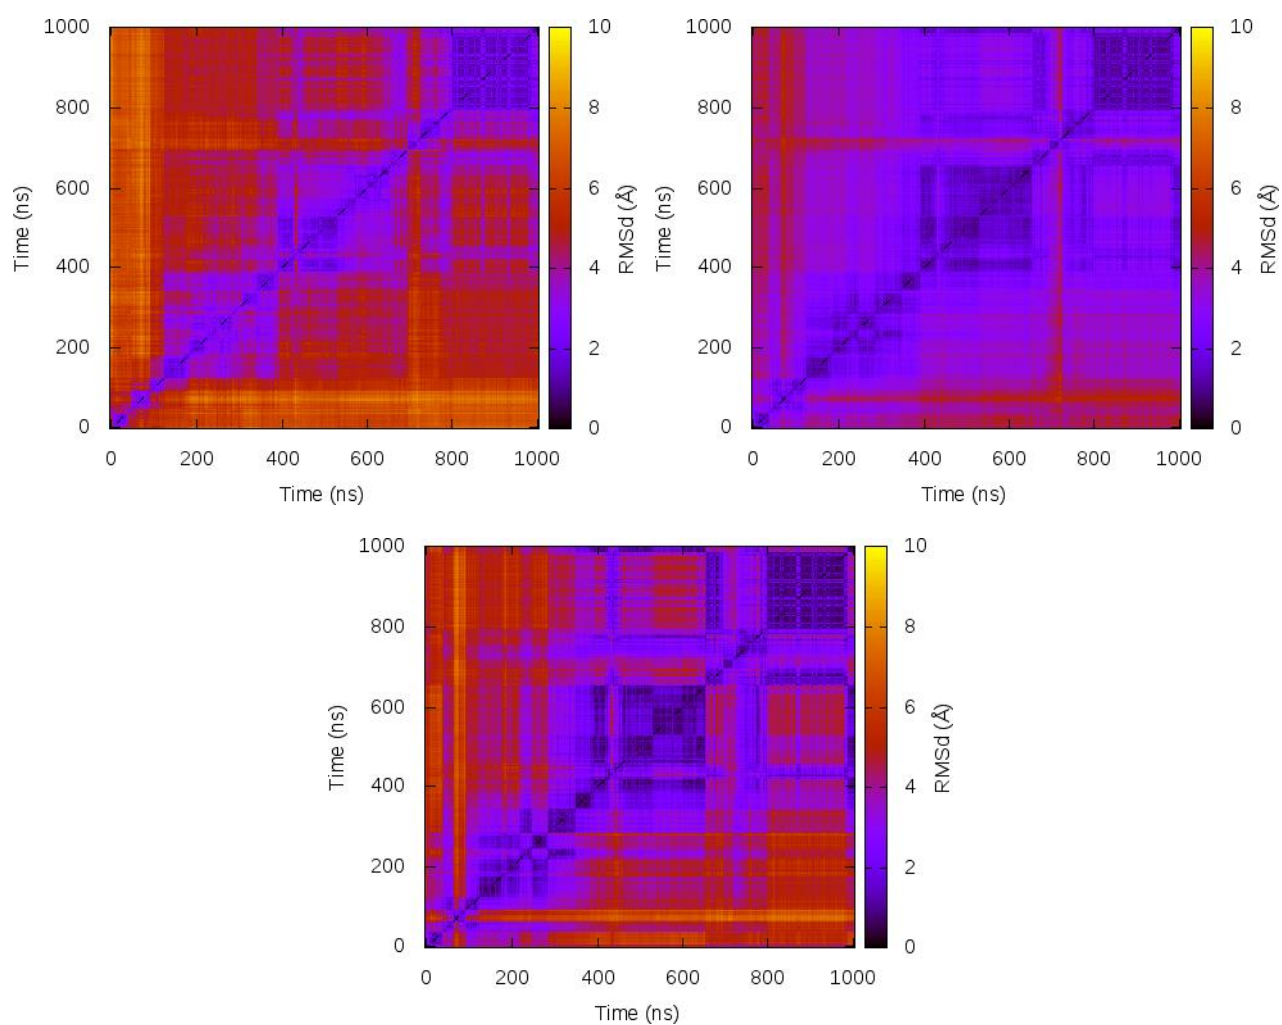

**Figure SA2.** 2D RMSd plots of structures in the simulation 1KF1-A. Top left: All-atom mass-weighted RMSd. Top right: All-guanosines-all-atom mass-weighted RMSd. Bottom: All-guanosines O6 RMSd.

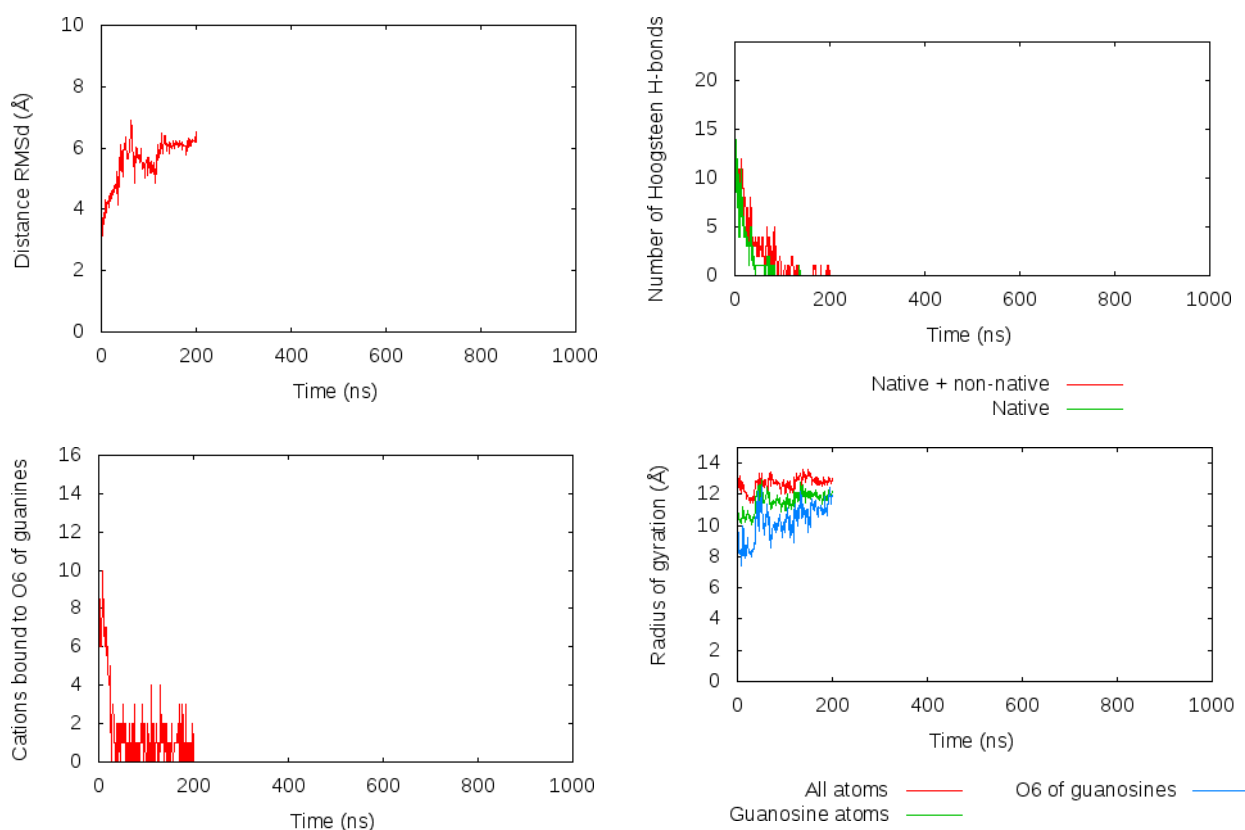

**Figure SA3.** Evolution of seven CVs in the simulation 1KF1-B. Top left: C4' distance RMSd with respect to the native structure 1KF1. Top right: Total number of native *c*WH G-G hydrogen bonds and total number of all *c*WH G-G hydrogen bonds. Bottom left: Total number of cation-G(O6) contacts. Bottom right: Radius of gyration of all atoms, all guanosine atoms, and G(O6) atoms only.

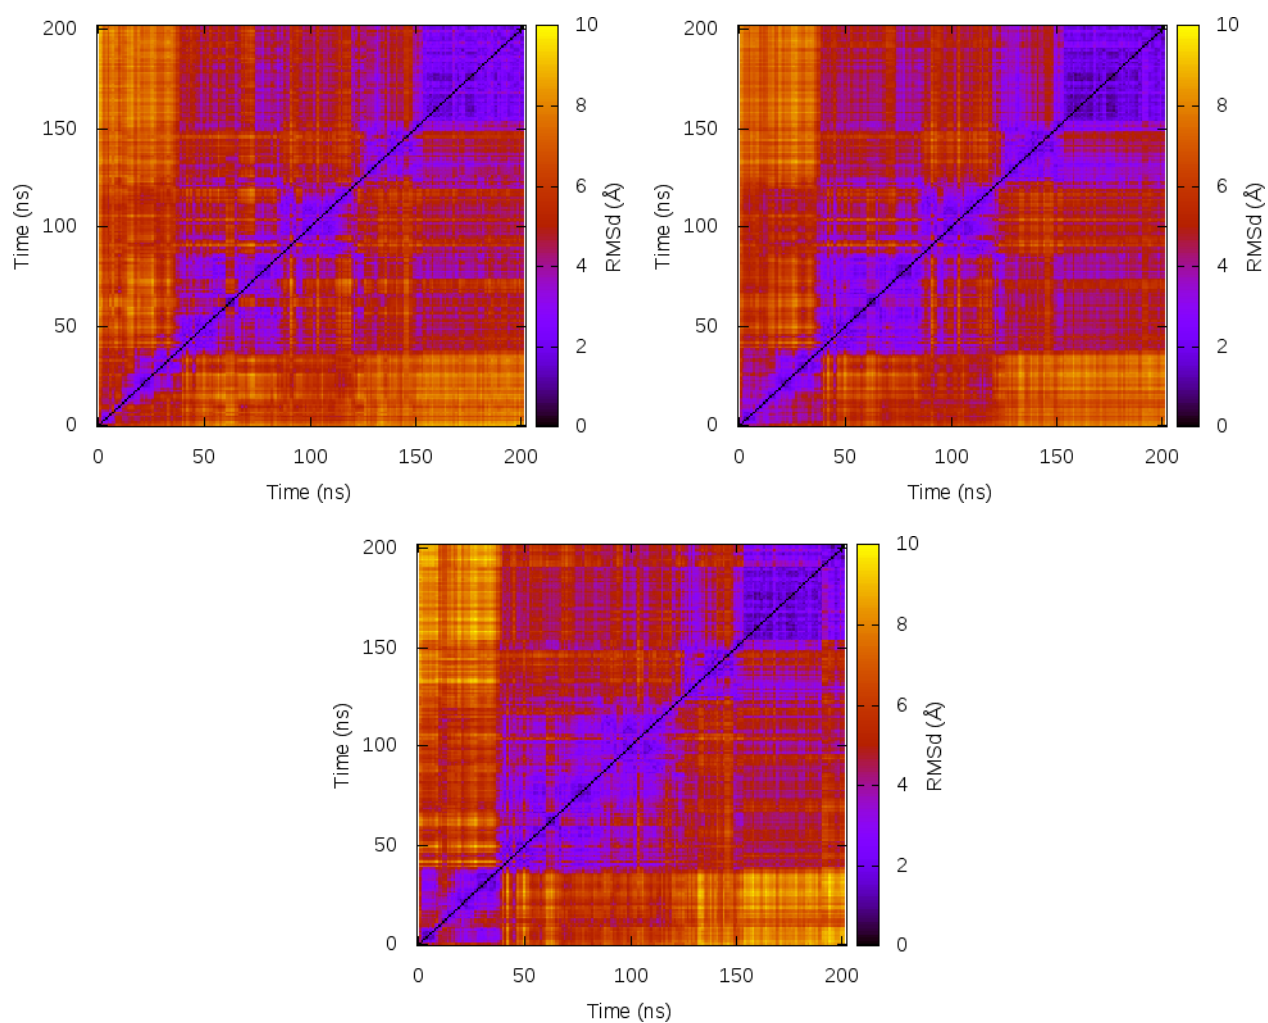

**Figure SA4.** 2D RMSd plots of structures in the simulation 1KF1-B. Top left: All-atom mass-weighted RMSd. Top right: All-guanosines-all-atom mass-weighted RMSd. Bottom: All-guanosines O6 RMSd.

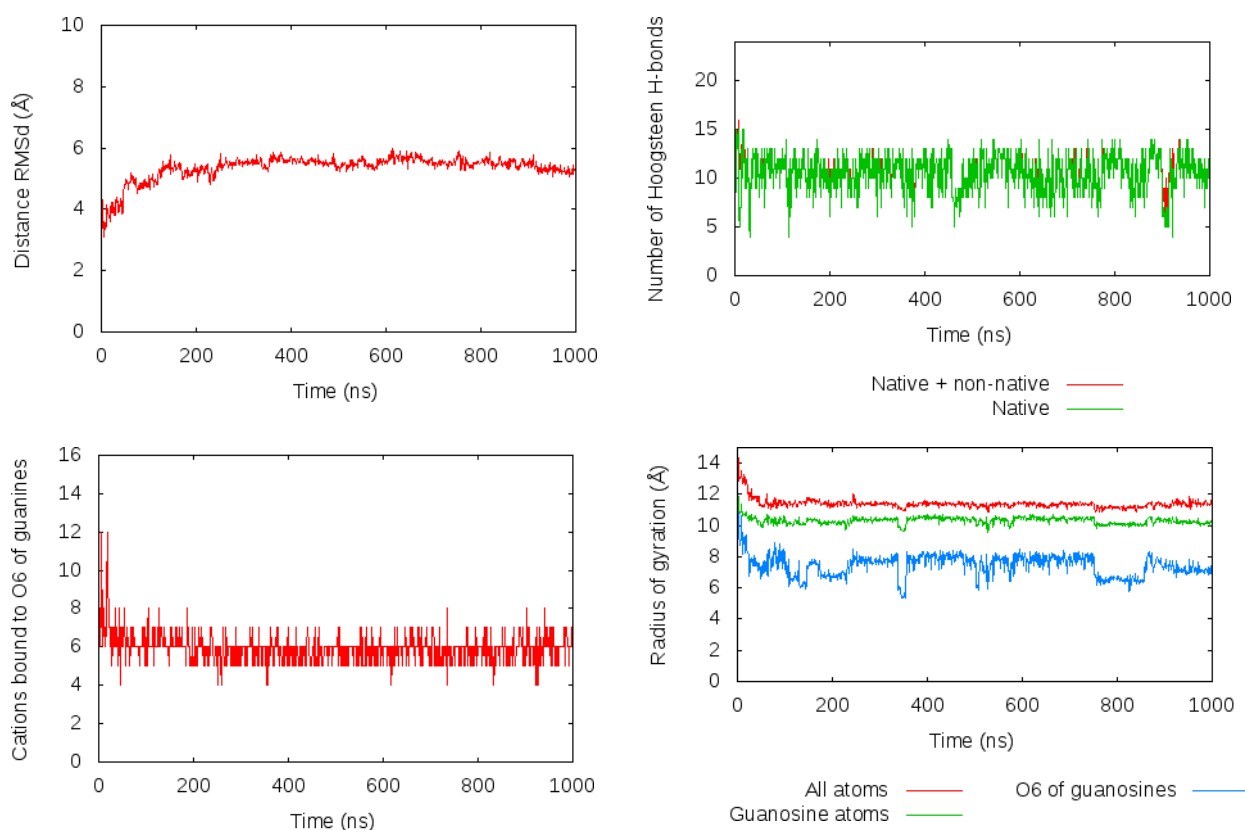

**Figure SA5.** Evolution of seven CVs in the simulation 1KF1-C. Top left: C4' distance RMSd with respect to the native structure 1KF1. Top right: Total number of native *c*WH G-G hydrogen bonds and total number of all *c*WH G-G hydrogen bonds. Bottom left: Total number of cation-G(O6) contacts. Bottom right: Radius of gyration of all atoms, all guanosine atoms, and G(O6) atoms only.

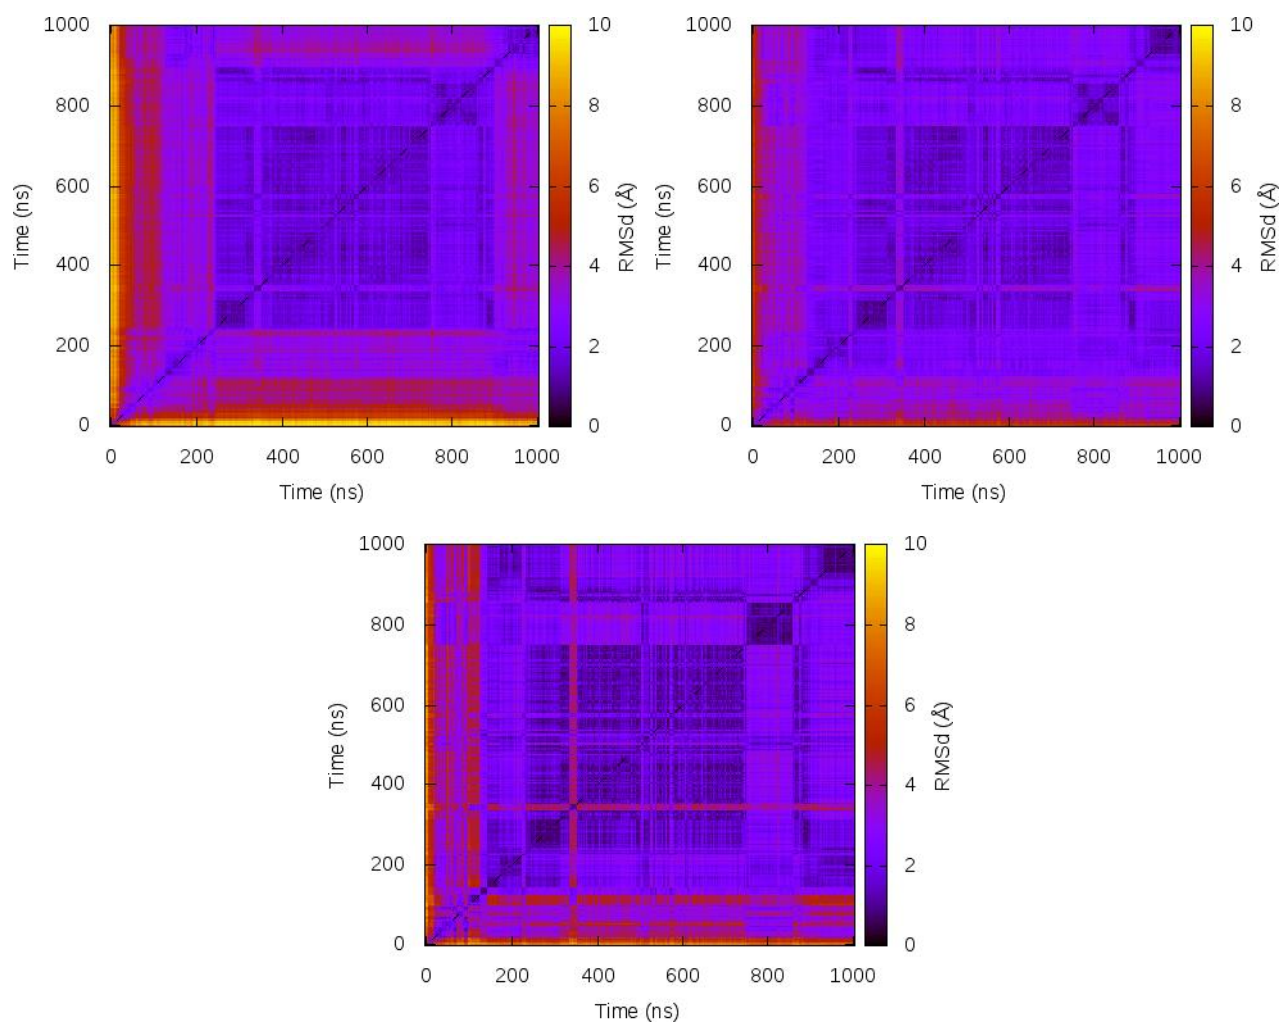

**Figure SA6.** 2D RMSd plots of structures in the simulation 1KF1-C. Top left: All-atom mass-weighted RMSd. Top right: All-guanosines-all-atom mass-weighted RMSd. Bottom: All-guanosines O6 RMSd.

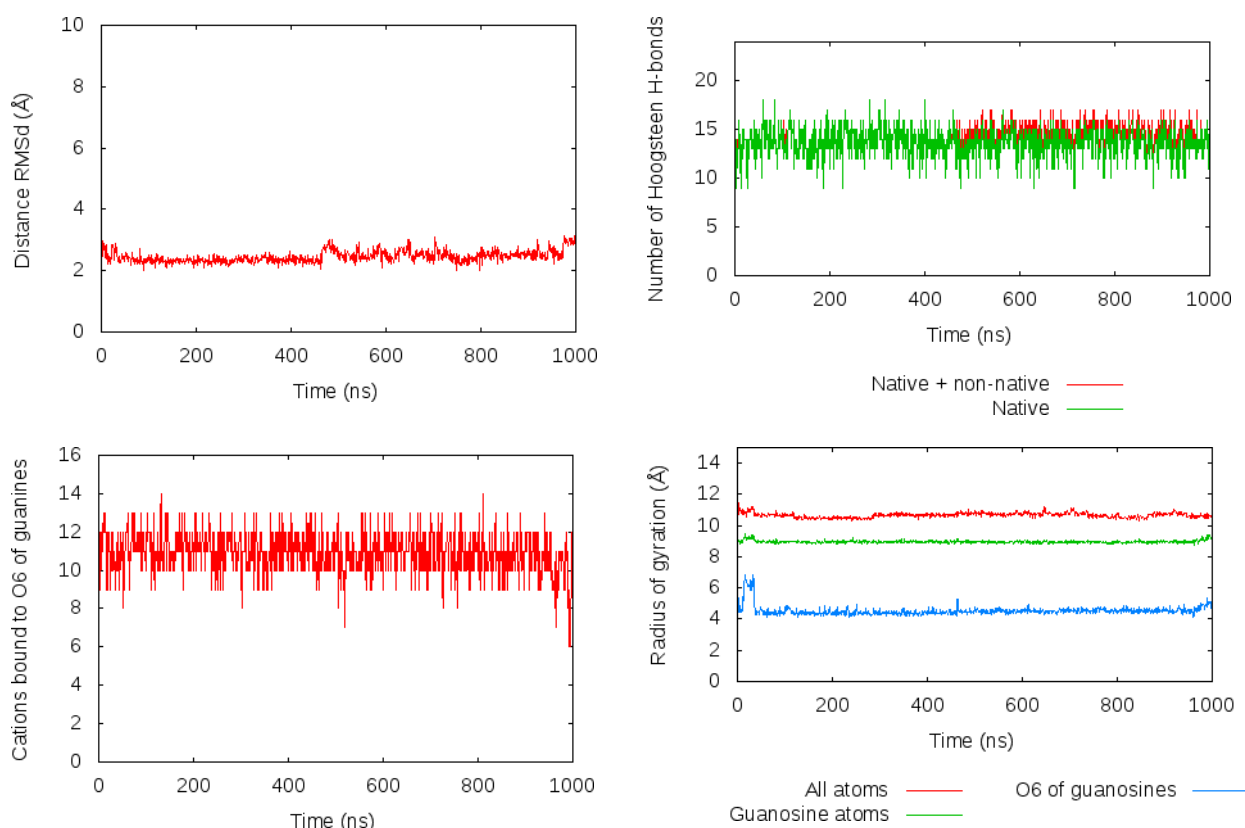

**Figure SA7.** Evolution of seven CVs in the simulation 143D-A. Top left: C4' distance RMSd with respect to the native structure 143D. Top right: Total number of native *c*WH G-G hydrogen bonds and total number of all *c*WH G-G hydrogen bonds. Bottom left: Total number of cation-G(O6) contacts. Bottom right: Radius of gyration of all atoms, all guanosine atoms, and G(O6) atoms only.



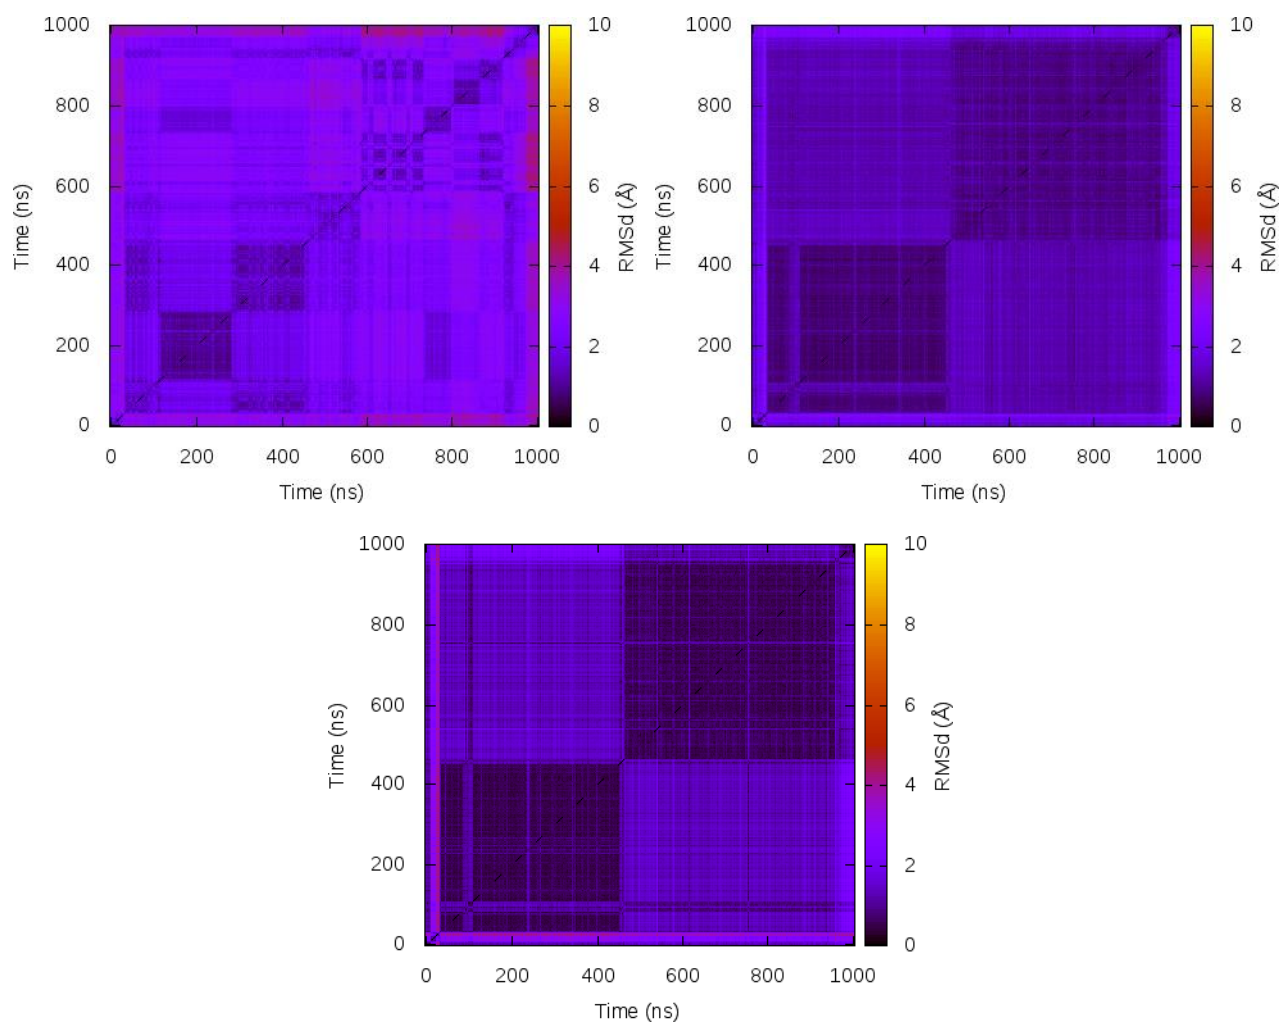

**Figure SA8.** 2D RMSd plots of structures in the simulation 143D-A. Top left: All-atom mass-weighted RMSd. Top right: All-guanosines-all-atom mass-weighted RMSd. Bottom: All-guanosines O6 RMSd.



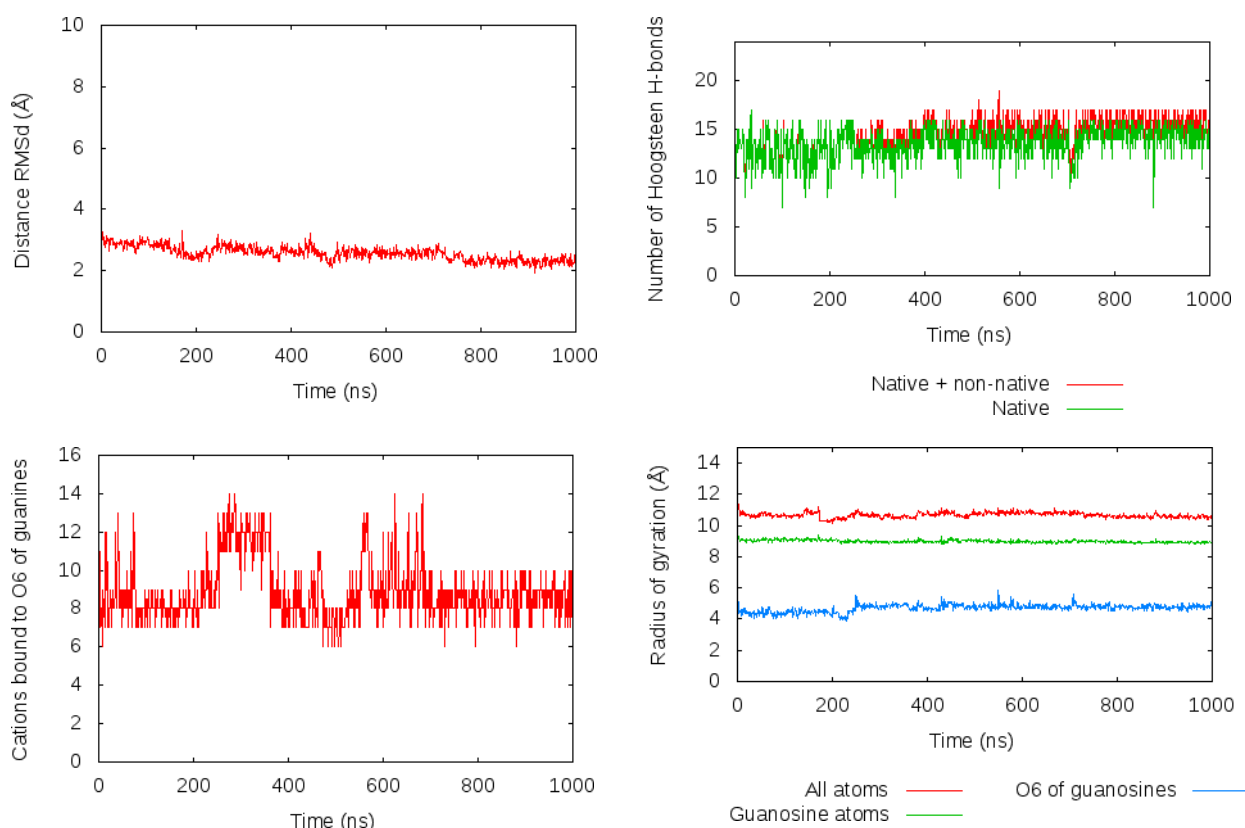

**Figure SA9.** Evolution of seven CVs in the simulation 143D-B. Top left: C4' distance RMSd with respect to the native structure 143D. Top right: Total number of native *c*WH G-G hydrogen bonds and total number of all *c*WH G-G hydrogen bonds. Bottom left: Total number of cation-G(O6) contacts. Bottom right: Radius of gyration of all atoms, all guanosine atoms, and G(O6) atoms only.

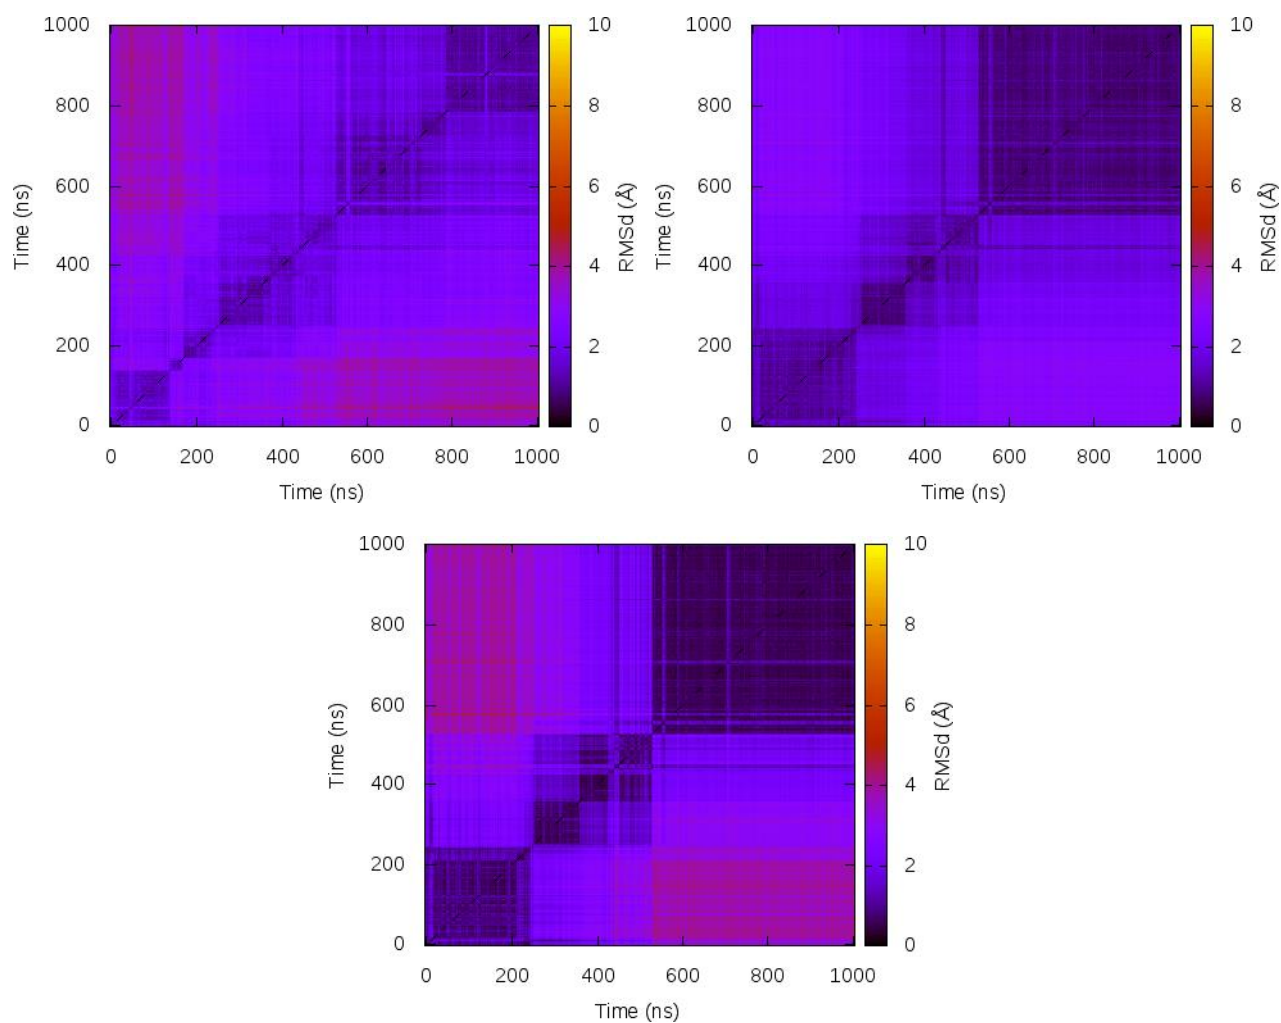

**Figure SA10.** 2D RMSd plots of structures in the simulation 143D-B. Top left: All-atom mass-weighted RMSd. Top right: All-guanosines-all-atom mass-weighted RMSd. Bottom: All-guanosines O6 RMSd.

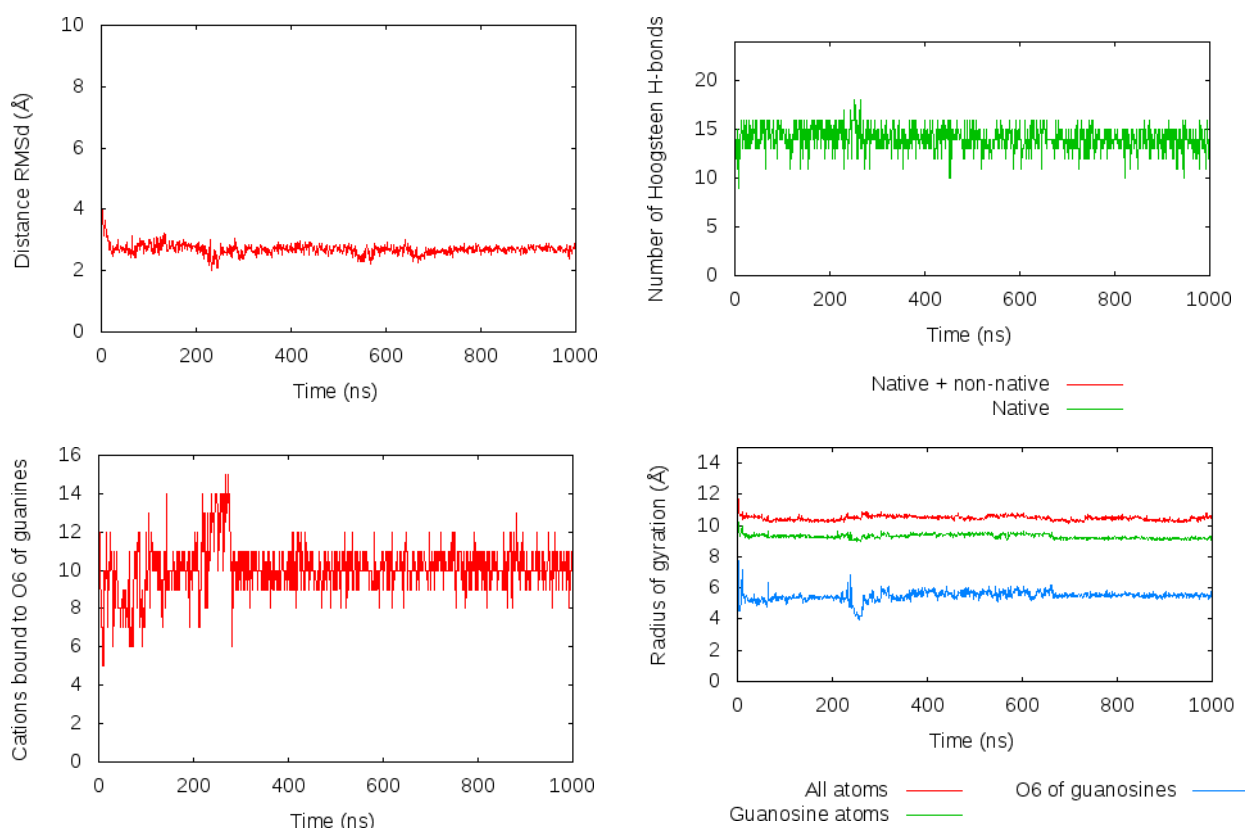

**Figure SA11.** Evolution of seven CVs in the simulation 143D-C. Top left: C4' distance RMSd with respect to the native structure 143D. Top right: Total number of native *c*WH G-G hydrogen bonds and total number of all *c*WH G-G hydrogen bonds. Bottom left: Total number of cation-G(O6) contacts. Bottom right: Radius of gyration of all atoms, all guanosine atoms, and G(O6) atoms only.

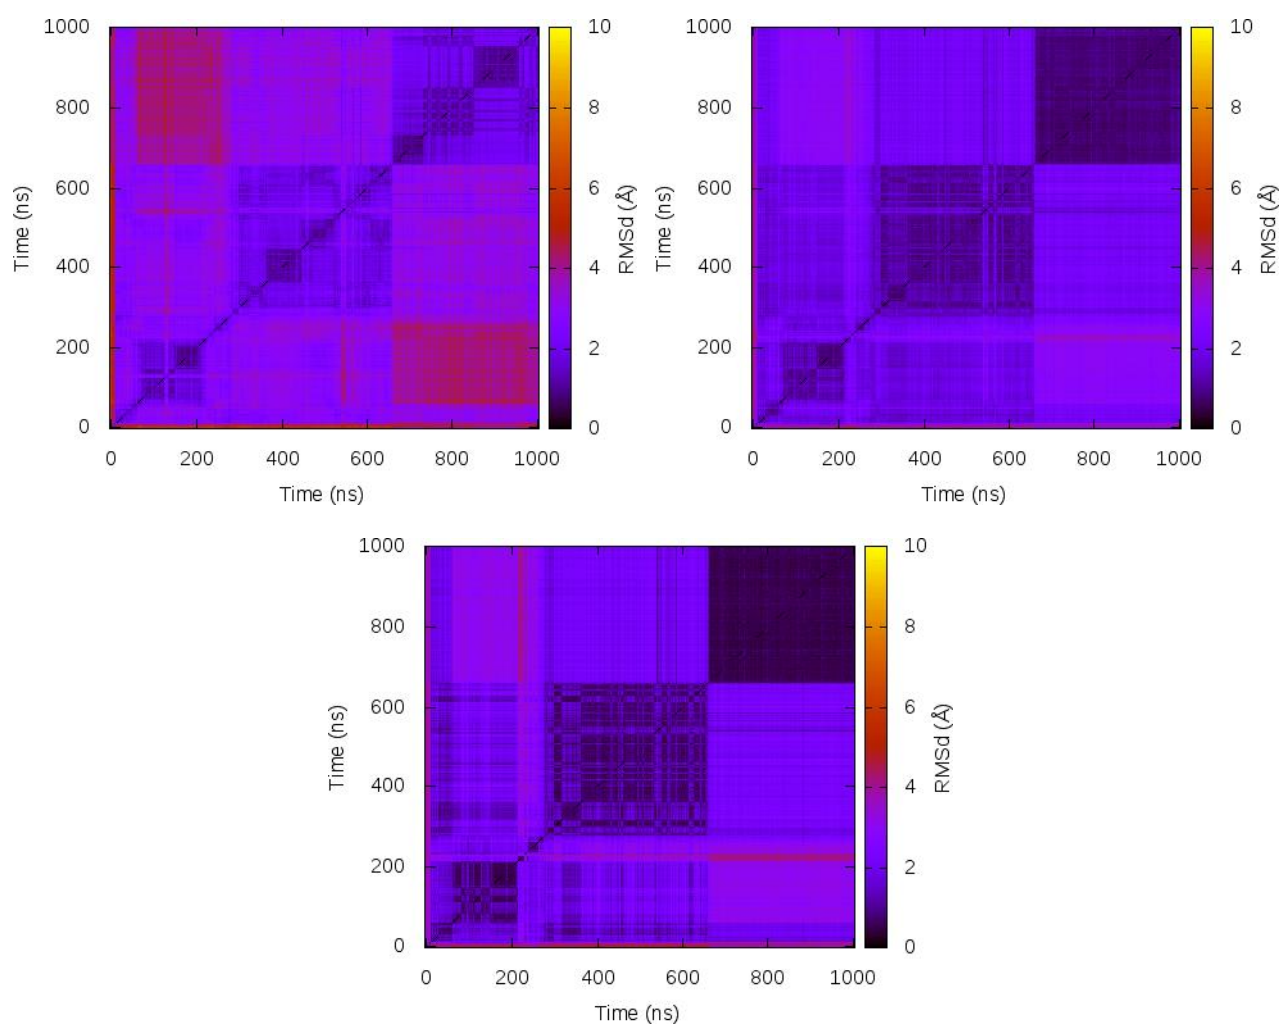

**Figure SA12.** 2D RMSd plots of structures in the simulation 143D-C. Top left: All-atom mass-weighted RMSd. Top right: All-guanosines-all-atom mass-weighted RMSd. Bottom: All-guanosines O6 RMSd.

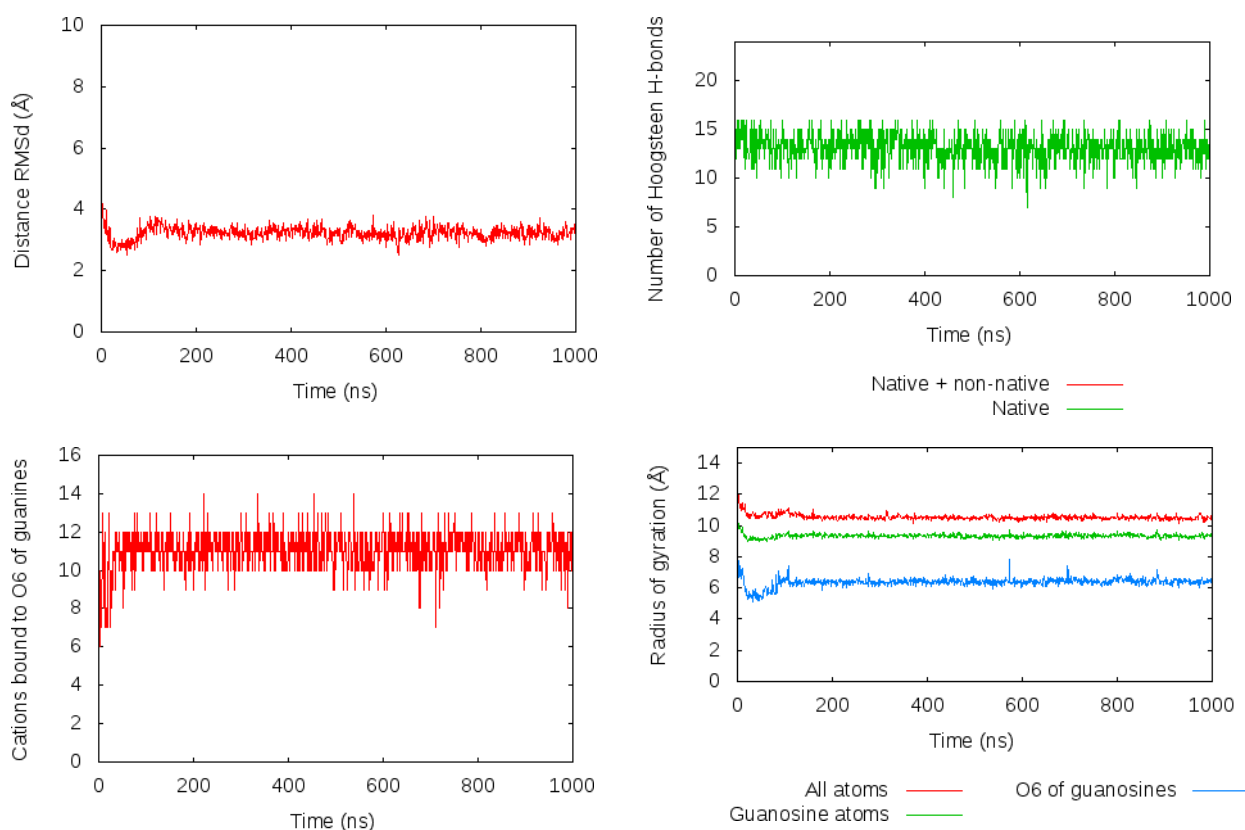

**Figure SA13.** Evolution of seven CVs in the simulation 143D-D. Top left: C4' distance RMSd with respect to the native structure 143D. Top right: Total number of native *c*WH G-G hydrogen bonds and total number of all *c*WH G-G hydrogen bonds. Bottom left: Total number of cation-G(O6) contacts. Bottom right: Radius of gyration of all atoms, all guanosine atoms, and G(O6) atoms only.

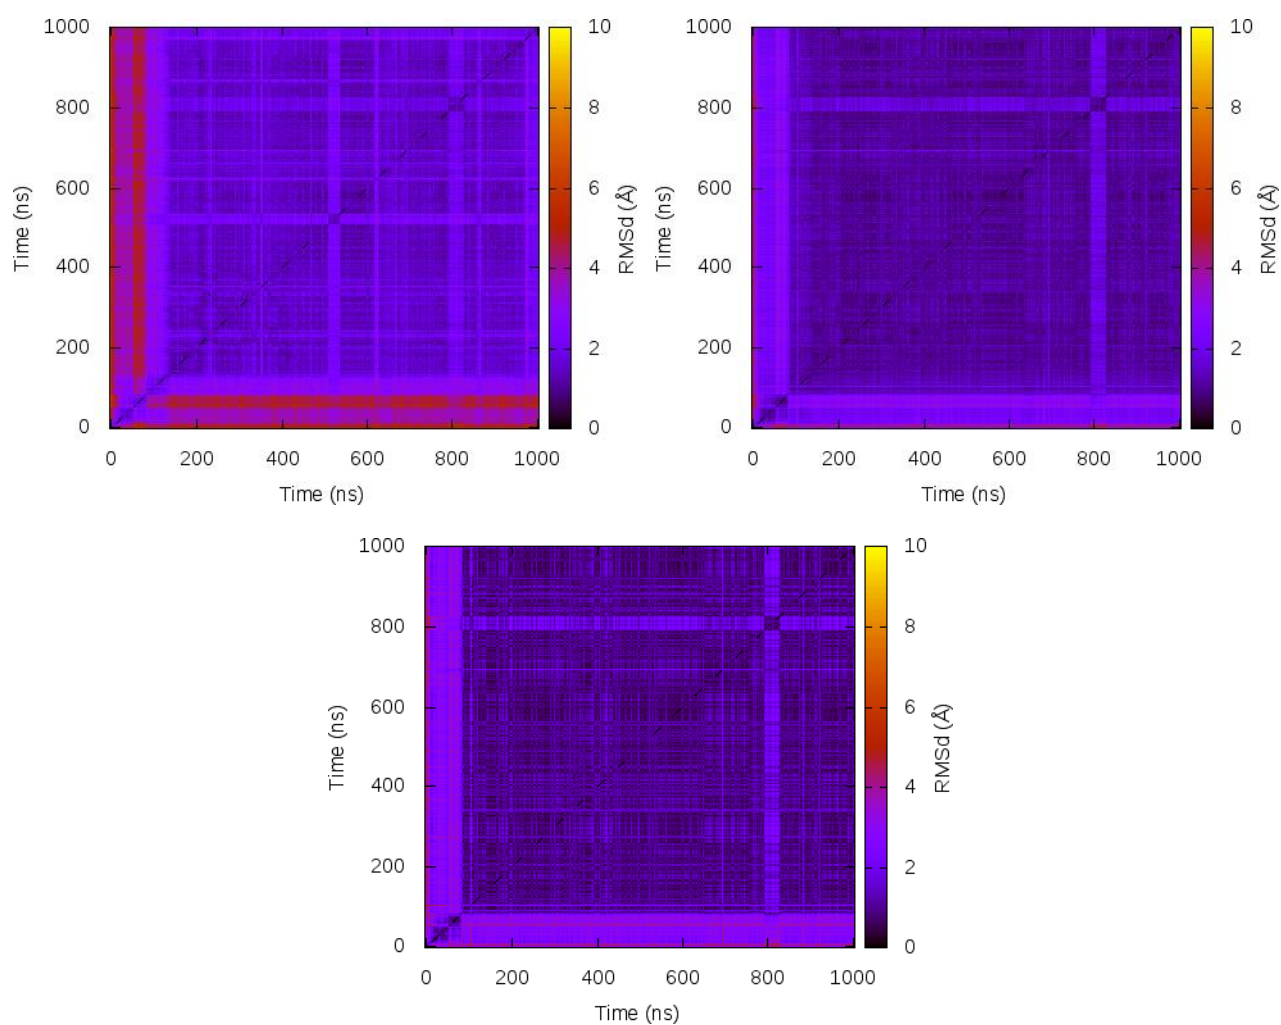

**Figure SA14.** 2D RMSd plots of structures in the simulation 143D-D. Top left: All-atom mass-weighted RMSd. Top right: All-guanosines-all-atom mass-weighted RMSd. Bottom: All-guanosines O6 RMSd.

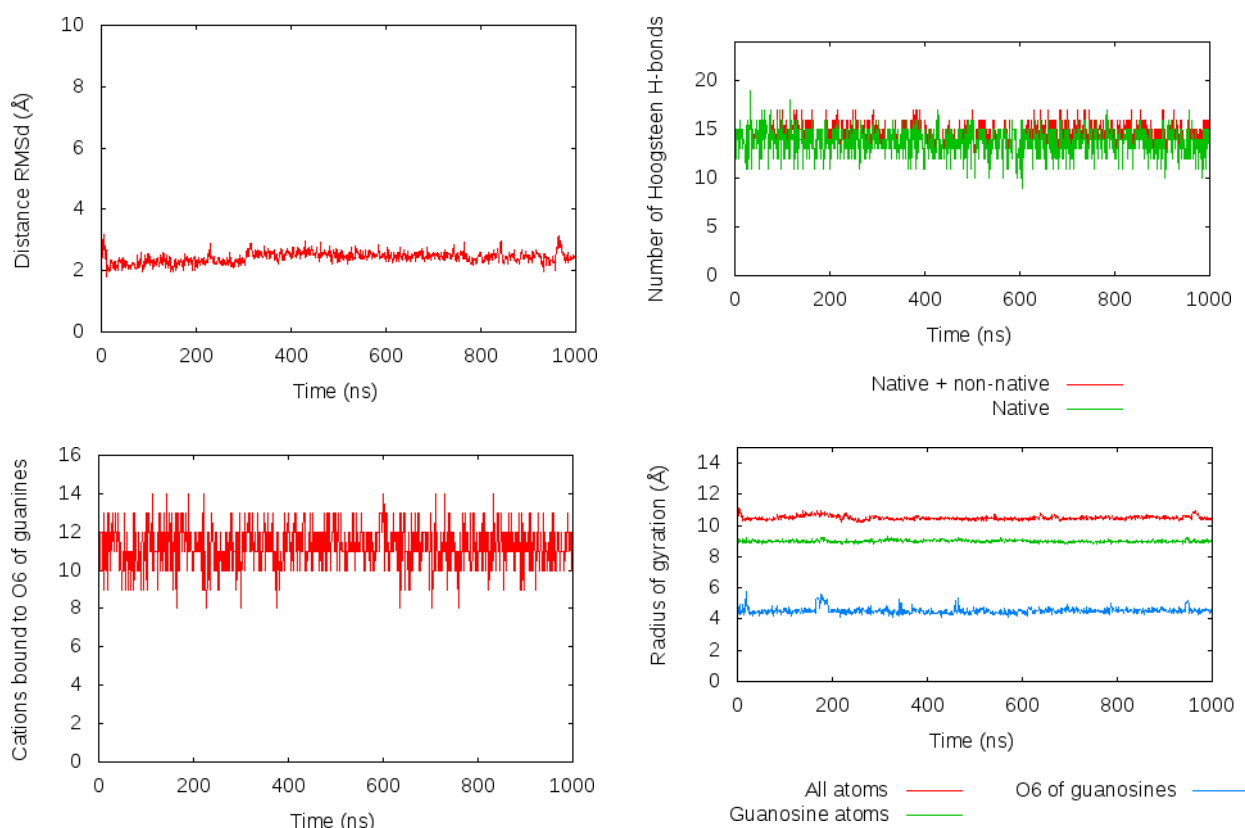

**Figure SA15.** Evolution of seven CVs in the simulation 143D-E. Top left: C4' distance RMSd with respect to the native structure 143D. Top right: Total number of native *c*WH G-G hydrogen bonds and total number of all *c*WH G-G hydrogen bonds. Bottom left: Total number of cation-G(O6) contacts. Bottom right: Radius of gyration of all atoms, all guanosine atoms, and G(O6) atoms only.



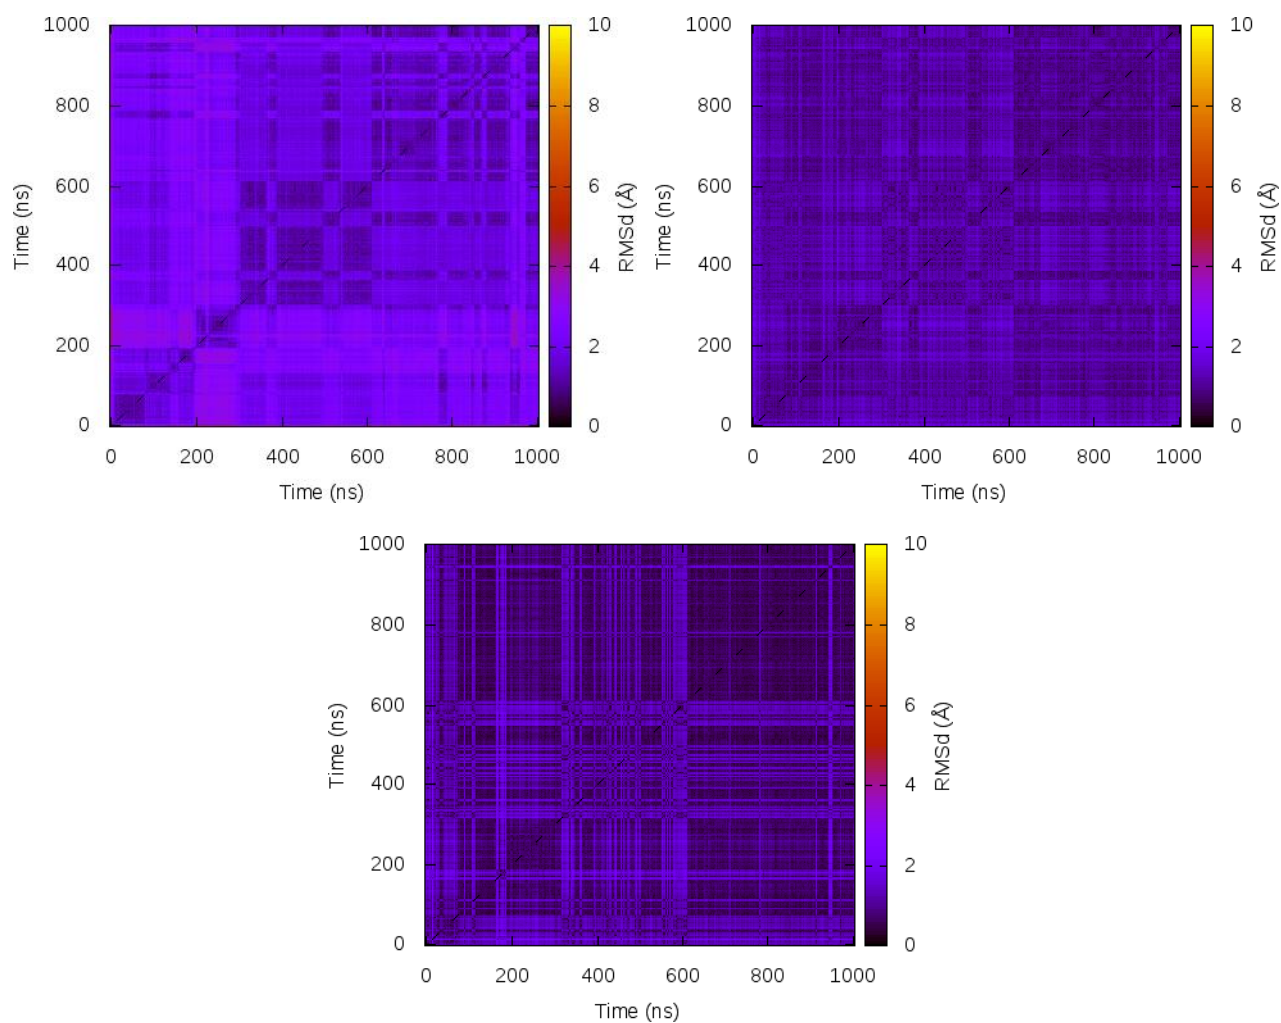

**Figure SA16.** 2D RMSd plots of structures in the simulation 143D-E. Top left: All-atom mass-weighted RMSd. Top right: All-guanosines-all-atom mass-weighted RMSd. Bottom: All-guanosines O6 RMSd.

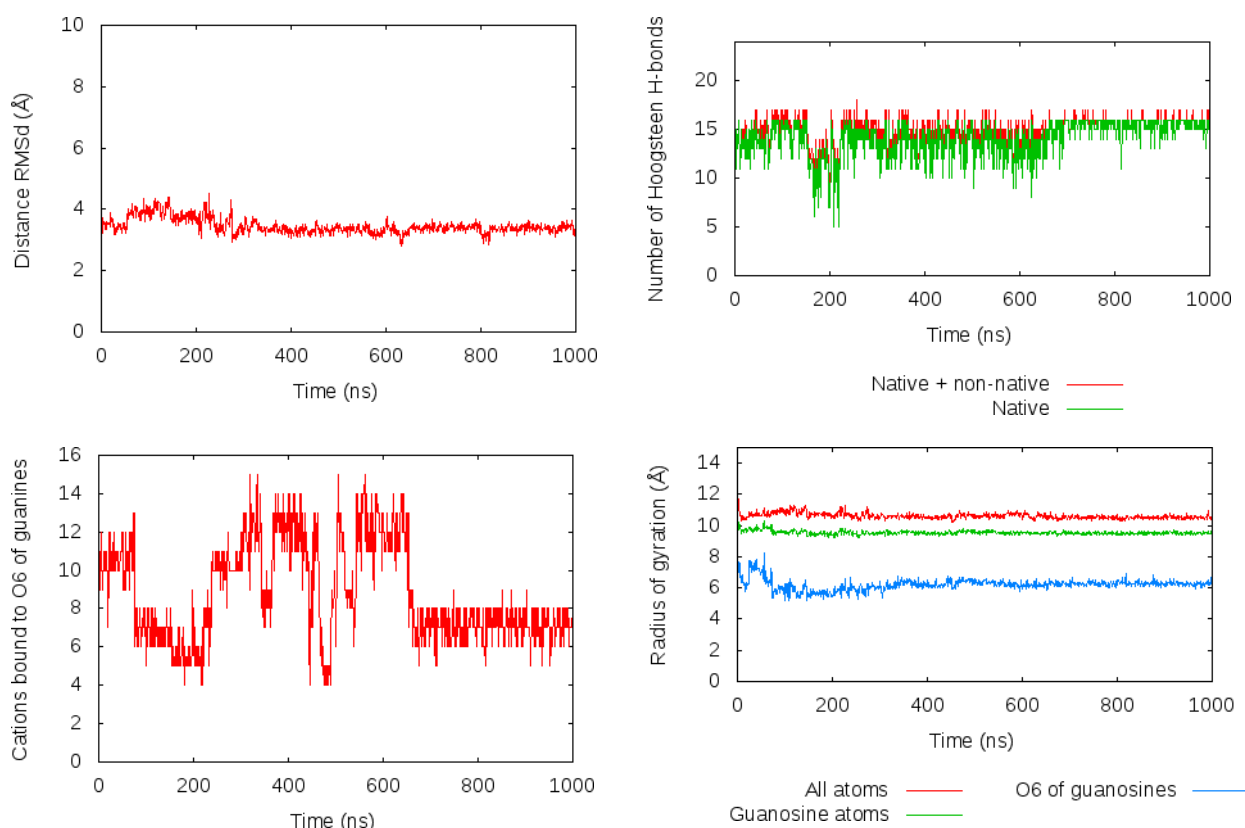

**Figure SA17.** Evolution of seven CVs in the simulation 143D-F. Top left: C4' distance RMSd with respect to the native structure 143D. Top right: Total number of native *c*WH G-G hydrogen bonds and total number of all *c*WH G-G hydrogen bonds. Bottom left: Total number of cation-G(O6) contacts. Bottom right: Radius of gyration of all atoms, all guanosine atoms, and G(O6) atoms only.

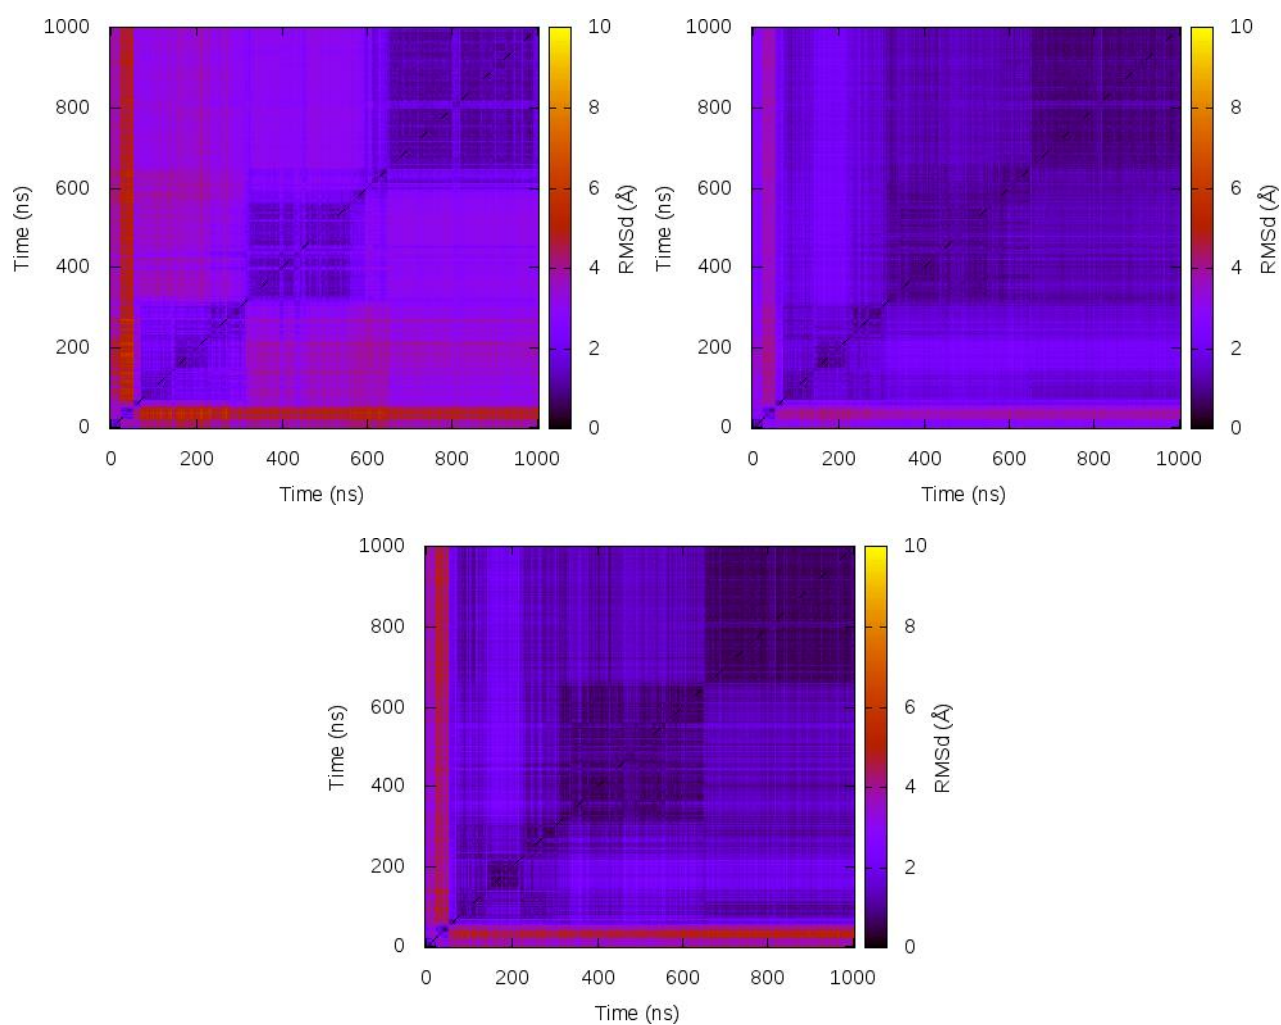

**Figure SA18.** 2D RMSd plots of structures in the simulation 143D-F. Top left: All-atom mass-weighted RMSd. Top right: All-guanosines-all-atom mass-weighted RMSd. Bottom: All-guanosines O6 RMSd.

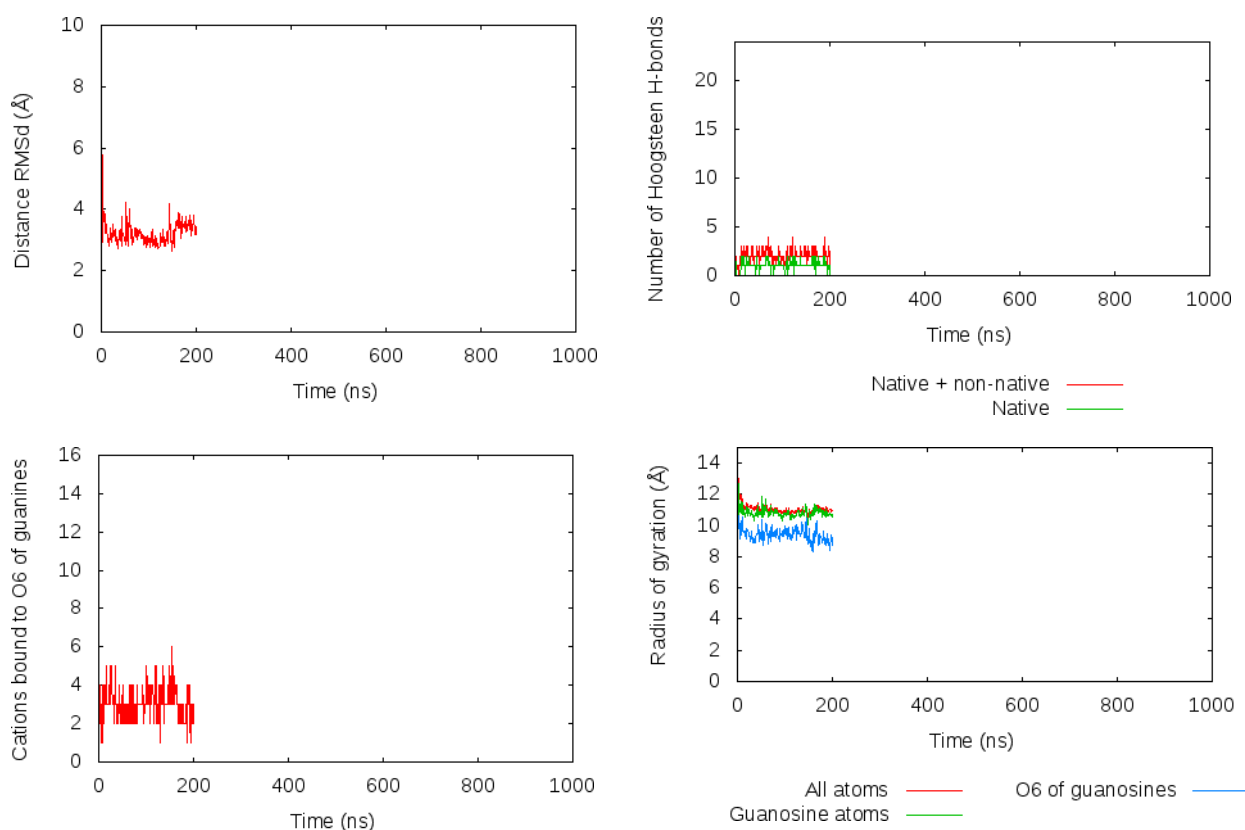

**Figure SA19.** Evolution of seven CVs in the simulation 143D-G. Top left: C4' distance RMSd with respect to the native structure 143D. Top right: Total number of native *c*WH G-G hydrogen bonds and total number of all *c*WH G-G hydrogen bonds. Bottom left: Total number of cation-G(O6) contacts. Bottom right: Radius of gyration of all atoms, all guanosine atoms, and G(O6) atoms only.

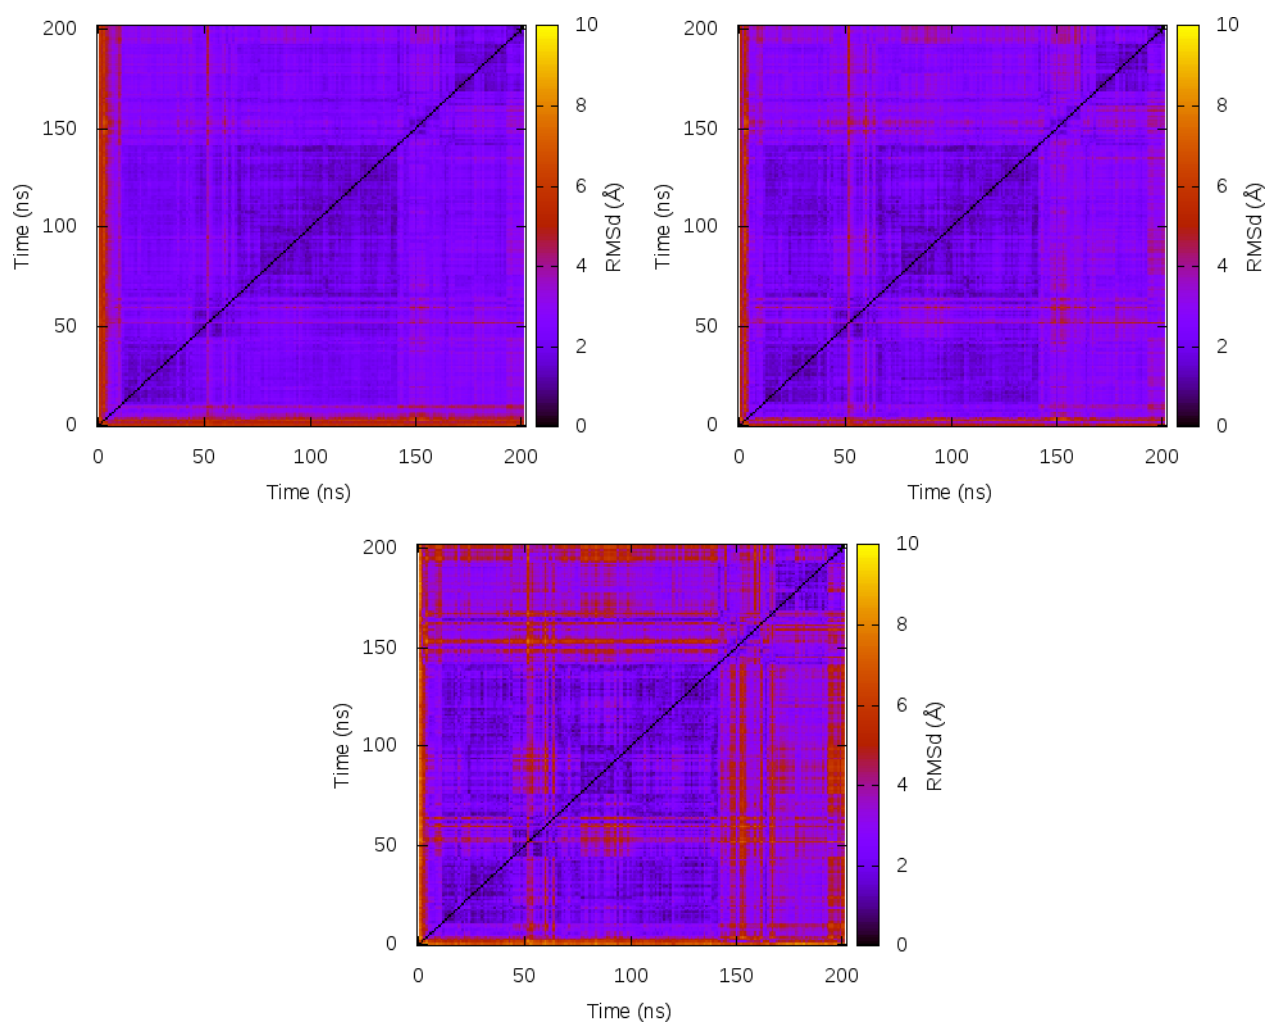

**Figure SA20.** 2D RMSd plots of structures in the simulation 143D-G. Top left: All-atom mass-weighted RMSd. Top right: All-guanosines-all-atom mass-weighted RMSd. Bottom: All-guanosines O6 RMSd.

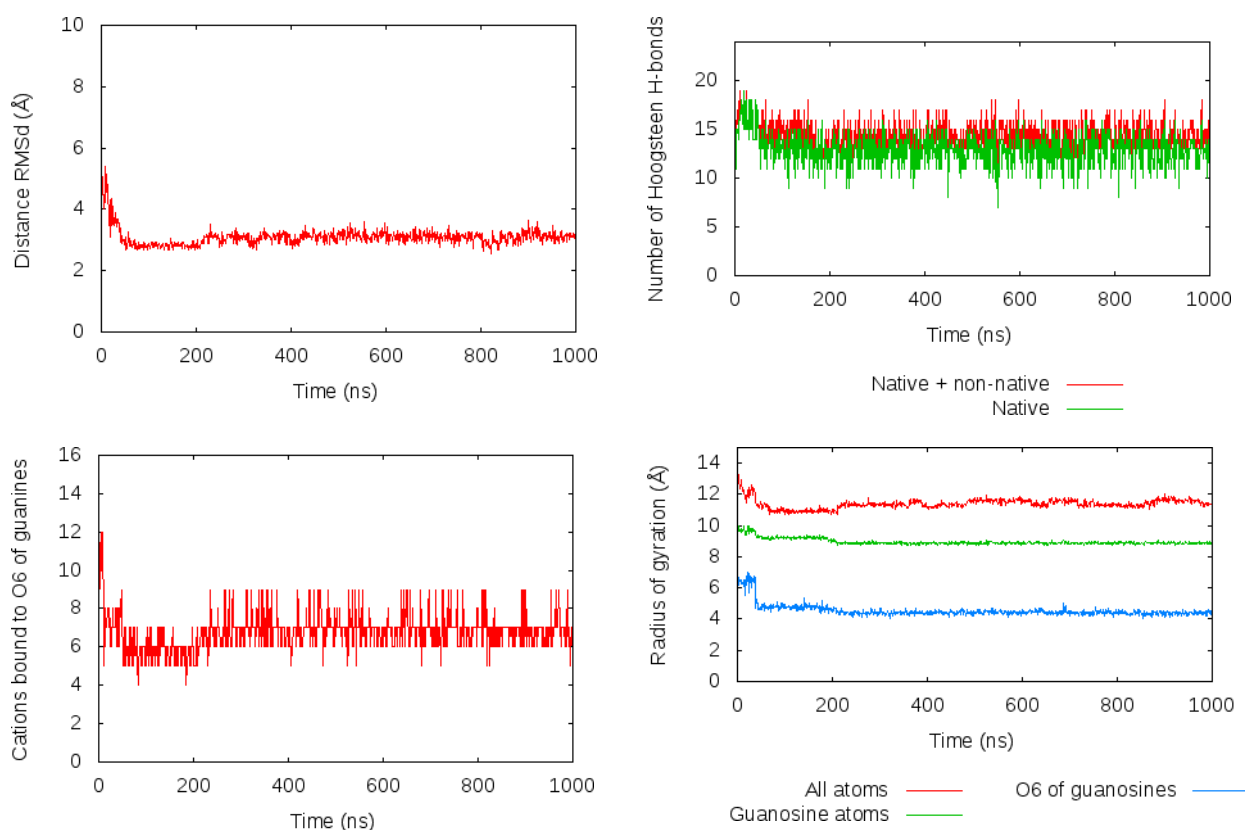

**Figure SA21.** Evolution of seven CVs in the simulation 2JSM-A. Top left: C4' distance RMSd with respect to the native structure 2JSM. Top right: Total number of native *c*WH G-G hydrogen bonds and total number of all *c*WH G-G hydrogen bonds. Bottom left: Total number of cation-G(O6) contacts. Bottom right: Radius of gyration of all atoms, all guanosine atoms, and G(O6) atoms only.

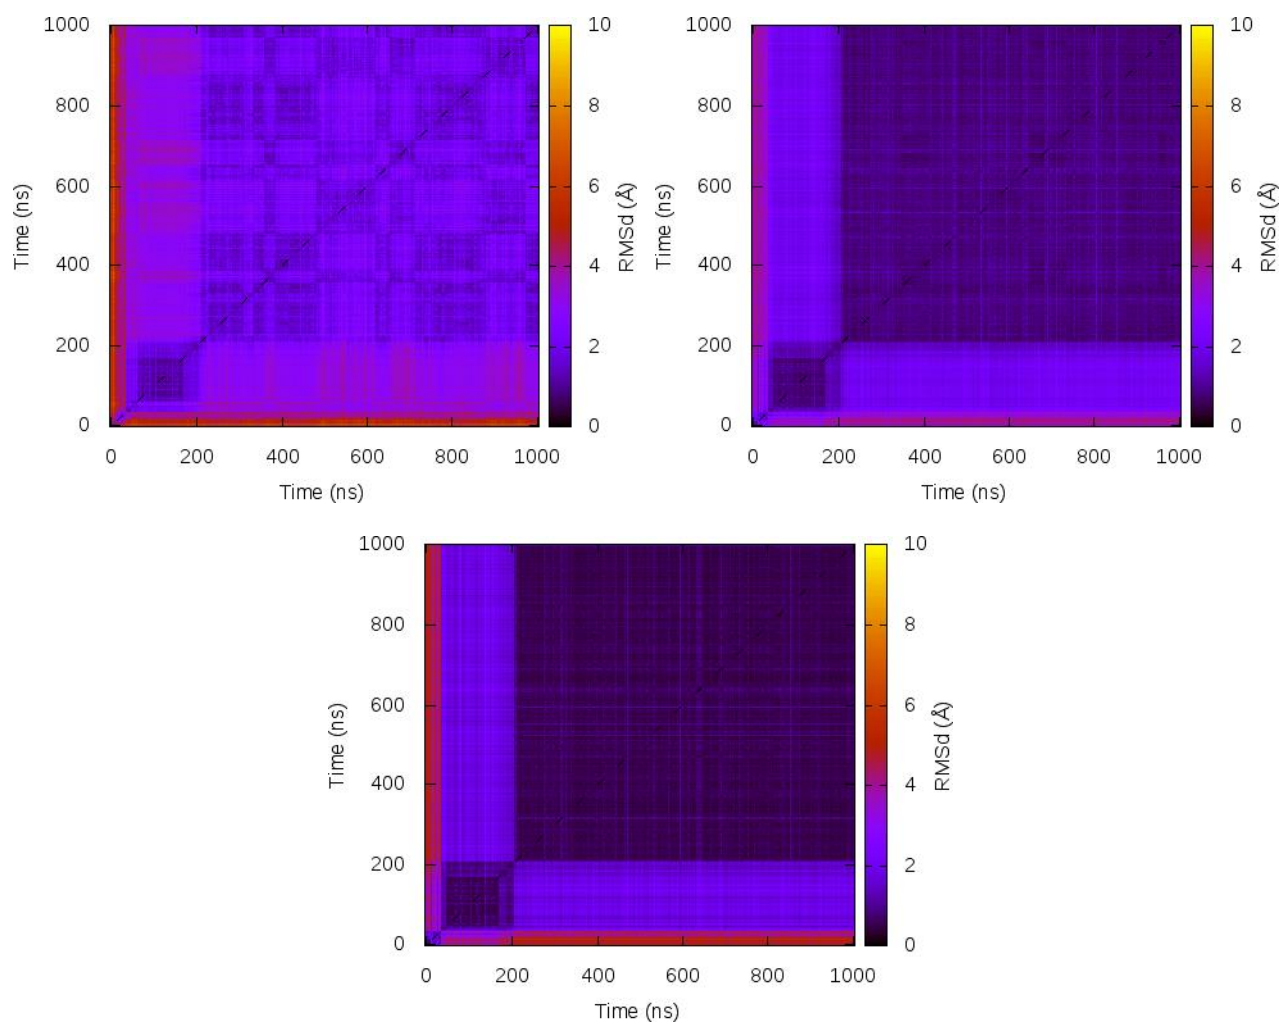

**Figure SA22.** 2D RMSd plots of structures in the simulation 2JSM-A. Top left: All-atom mass-weighted RMSd. Top right: All-guanosines-all-atom mass-weighted RMSd. Bottom: All-guanosines O6 RMSd.



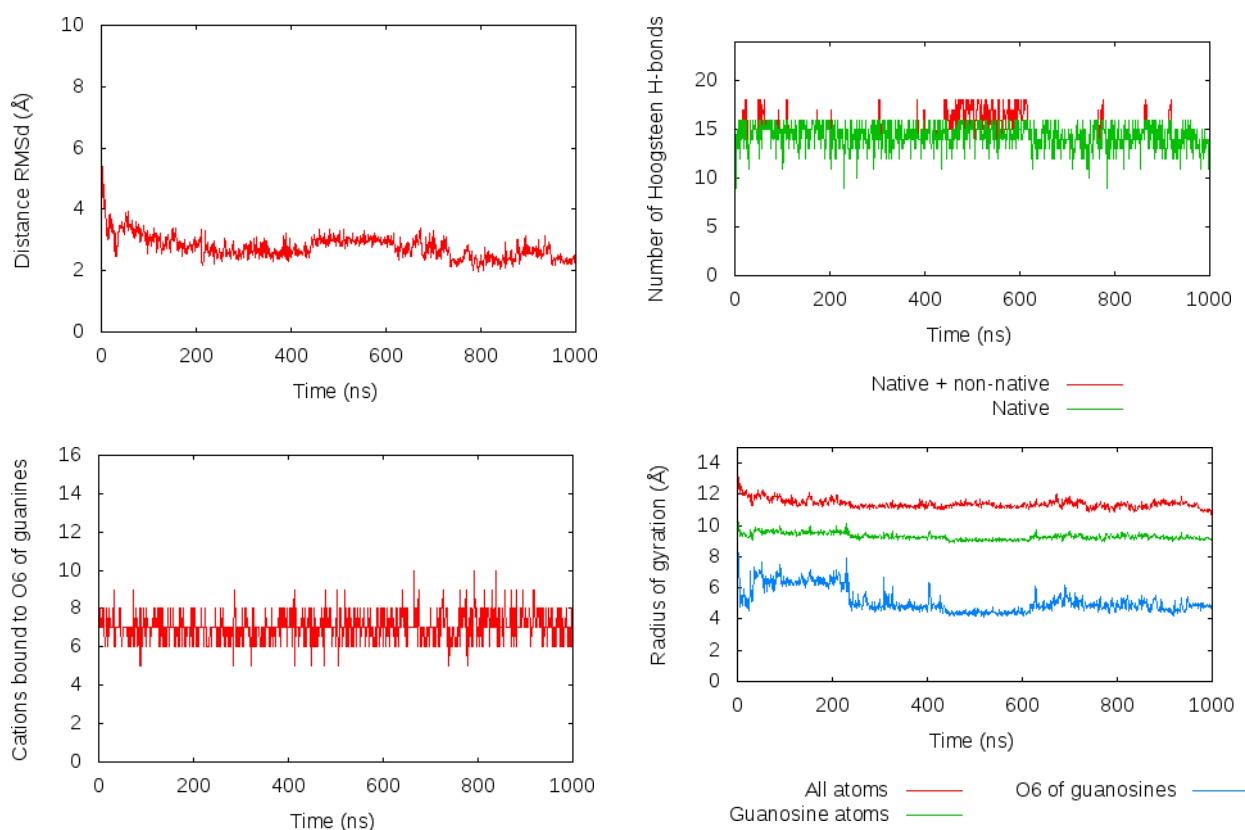

**Figure SA23.** Evolution of seven CVs in the simulation 2JSM-B. Top left: C4' distance RMSd with respect to the native structure 2JSM. Top right: Total number of native *c*WH G-G hydrogen bonds and total number of all *c*WH G-G hydrogen bonds. Bottom left: Total number of cation-G(O6) contacts. Bottom right: Radius of gyration of all atoms, all guanosine atoms, and G(O6) atoms only.

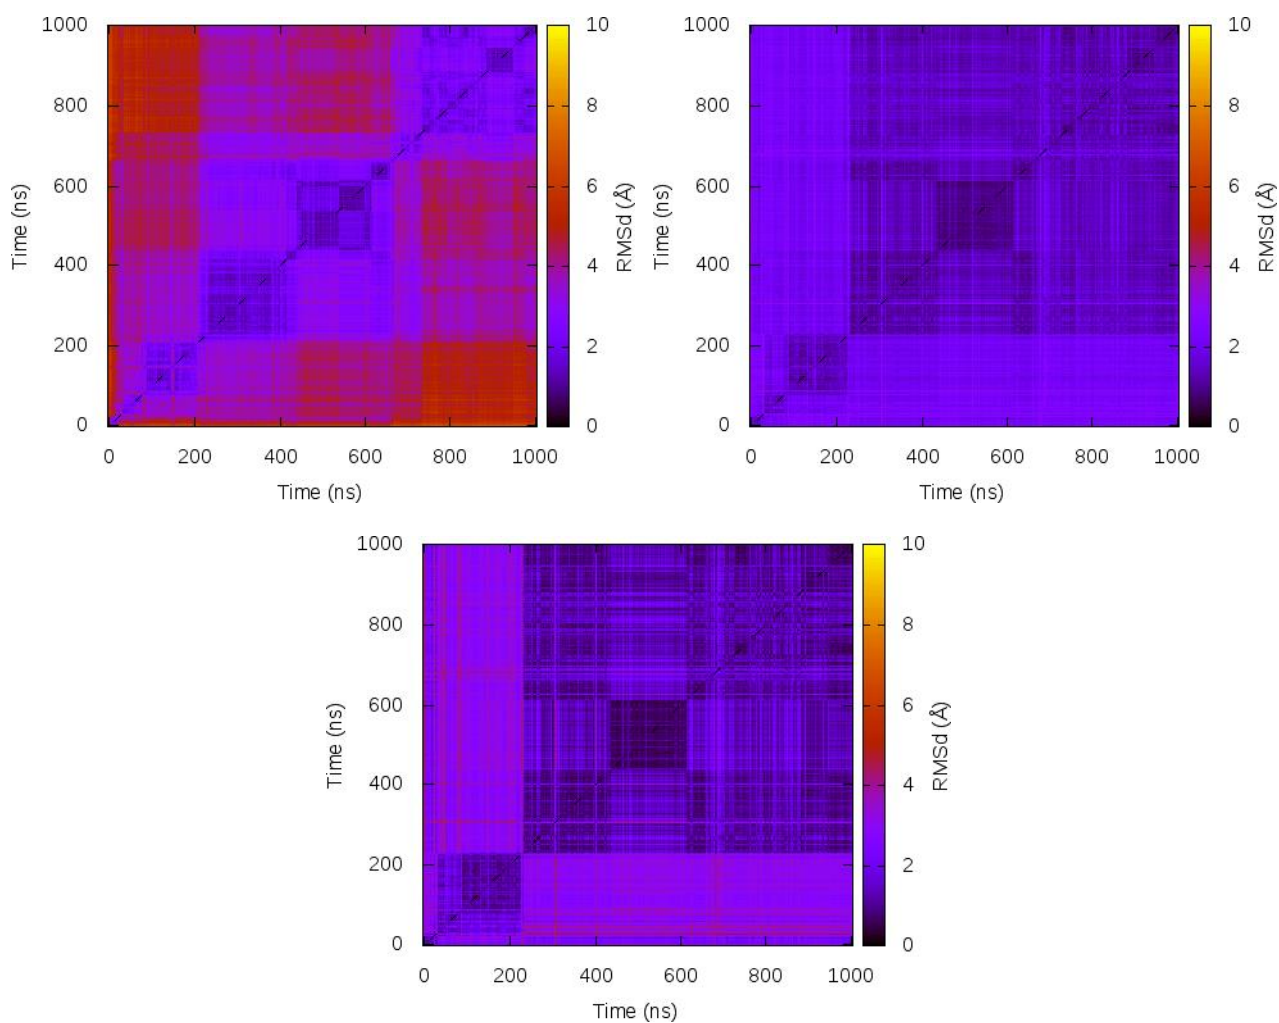

**Figure SA24.** 2D RMSd plots of structures in the simulation 2JSM-B. Top left: All-atom mass-weighted RMSd. Top right: All-guanosines-all-atom mass-weighted RMSd. Bottom: All-guanosines O6 RMSd.

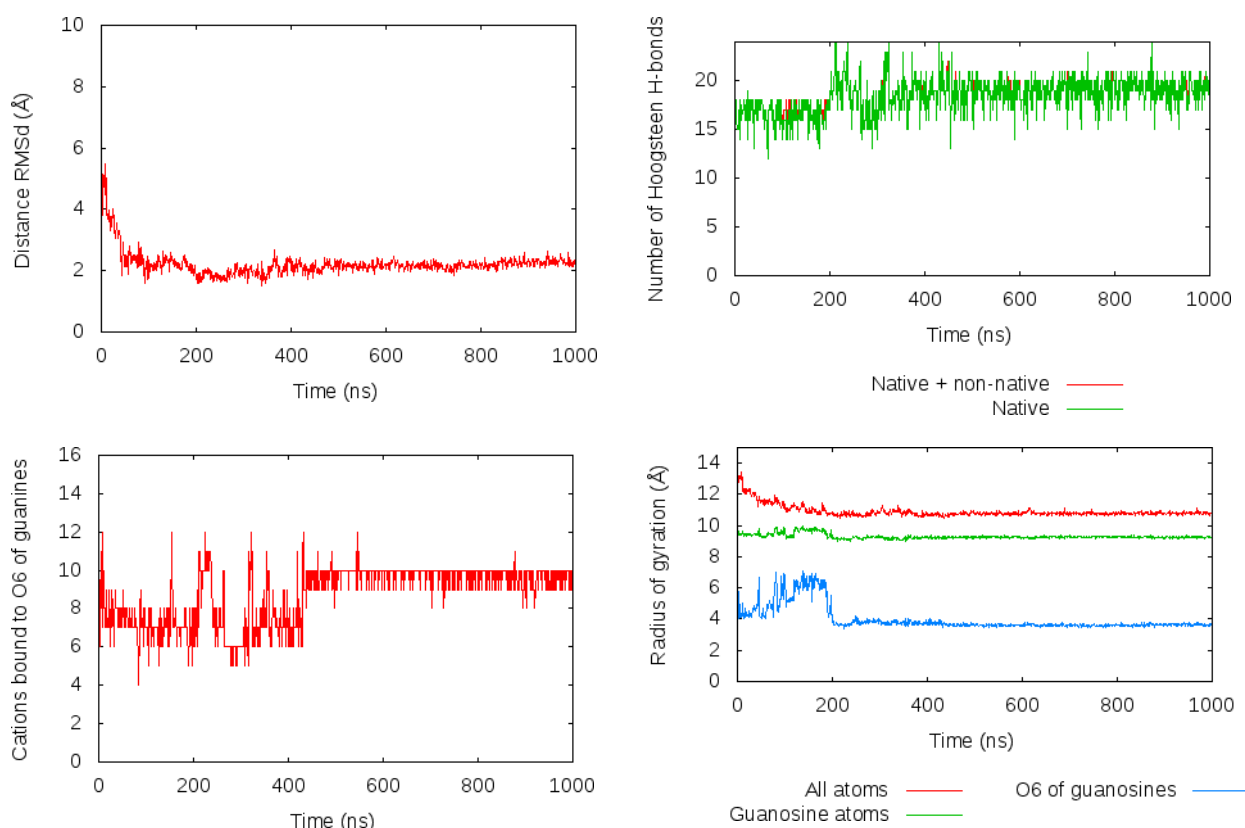

**Figure SA25.** Evolution of seven CVs in the simulation 2JSM-C. Top left: C4' distance RMSd with respect to the native structure 2JSM. Top right: Total number of native *c*WH G-G hydrogen bonds and total number of all *c*WH G-G hydrogen bonds. Bottom left: Total number of cation-G(O6) contacts. Bottom right: Radius of gyration of all atoms, all guanosine atoms, and G(O6) atoms only.

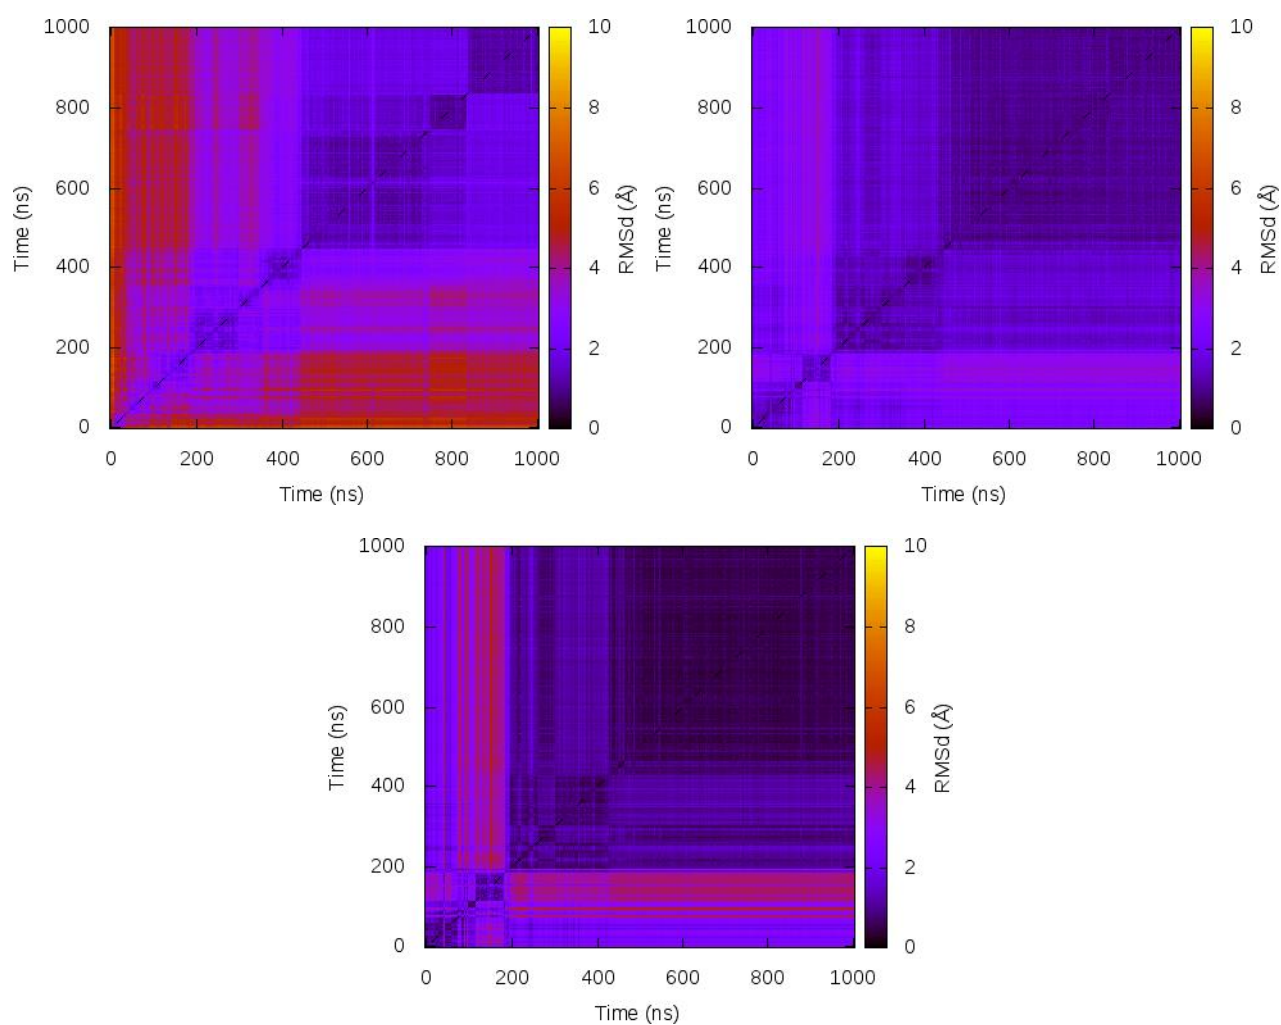

**Figure SA26.** 2D RMSd plots of structures in the simulation 2JSM-C. Top left: All-atom mass-weighted RMSd. Top right: All-guanosines-all-atom mass-weighted RMSd. Bottom: All-guanosines O6 RMSd.

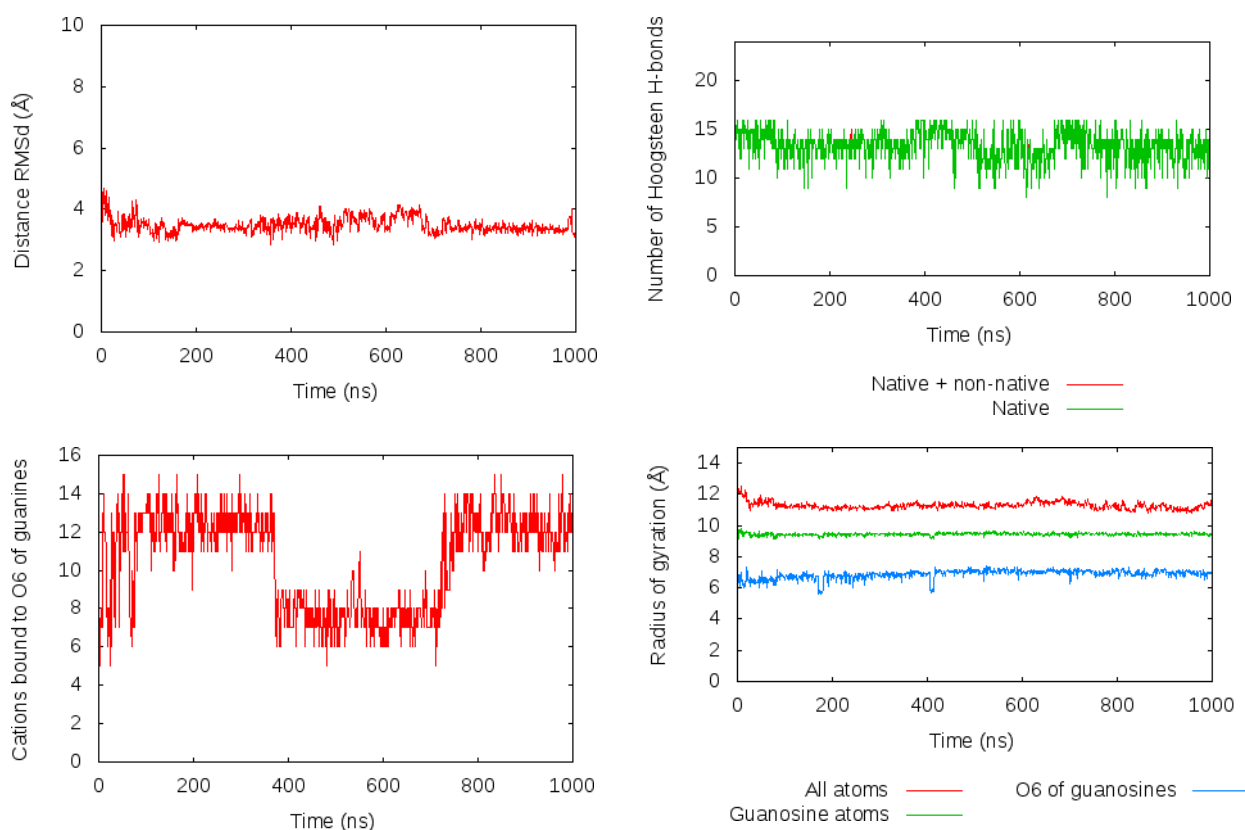

**Figure SA27.** Evolution of seven CVs in the simulation 2JSM-D. Top left: C4' distance RMSd with respect to the native structure 2JSM. Top right: Total number of native *c*WH G-G hydrogen bonds and total number of all *c*WH G-G hydrogen bonds. Bottom left: Total number of cation-G(O6) contacts. Bottom right: Radius of gyration of all atoms, all guanosine atoms, and G(O6) atoms only.

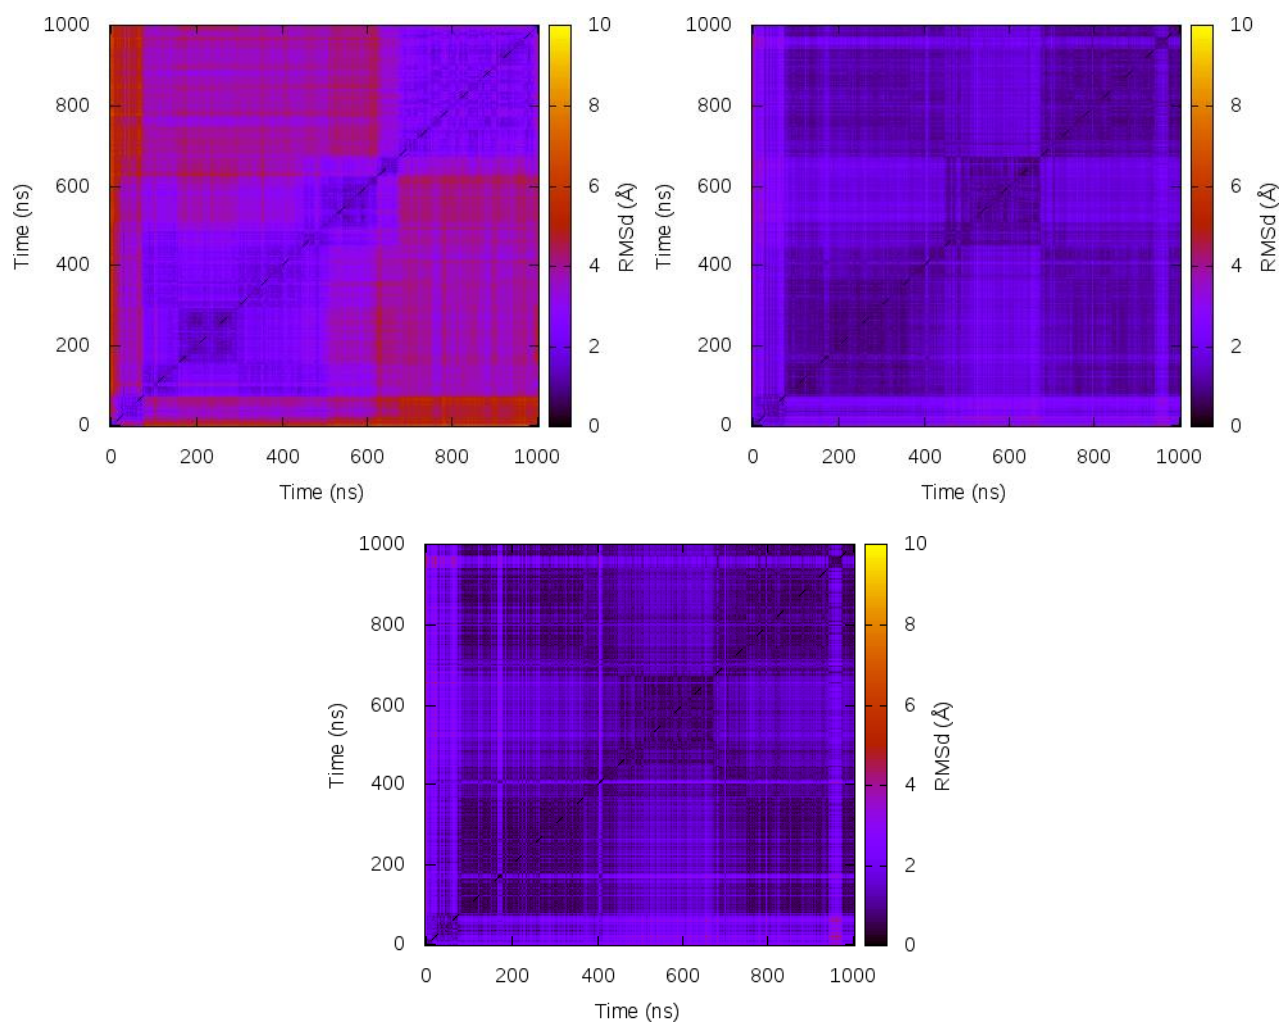

**Figure SA28.** 2D RMSd plots of structures in the simulation 2JSM-D. Top left: All-atom mass-weighted RMSd. Top right: All-guanosines-all-atom mass-weighted RMSd. Bottom: All-guanosines O6 RMSd.

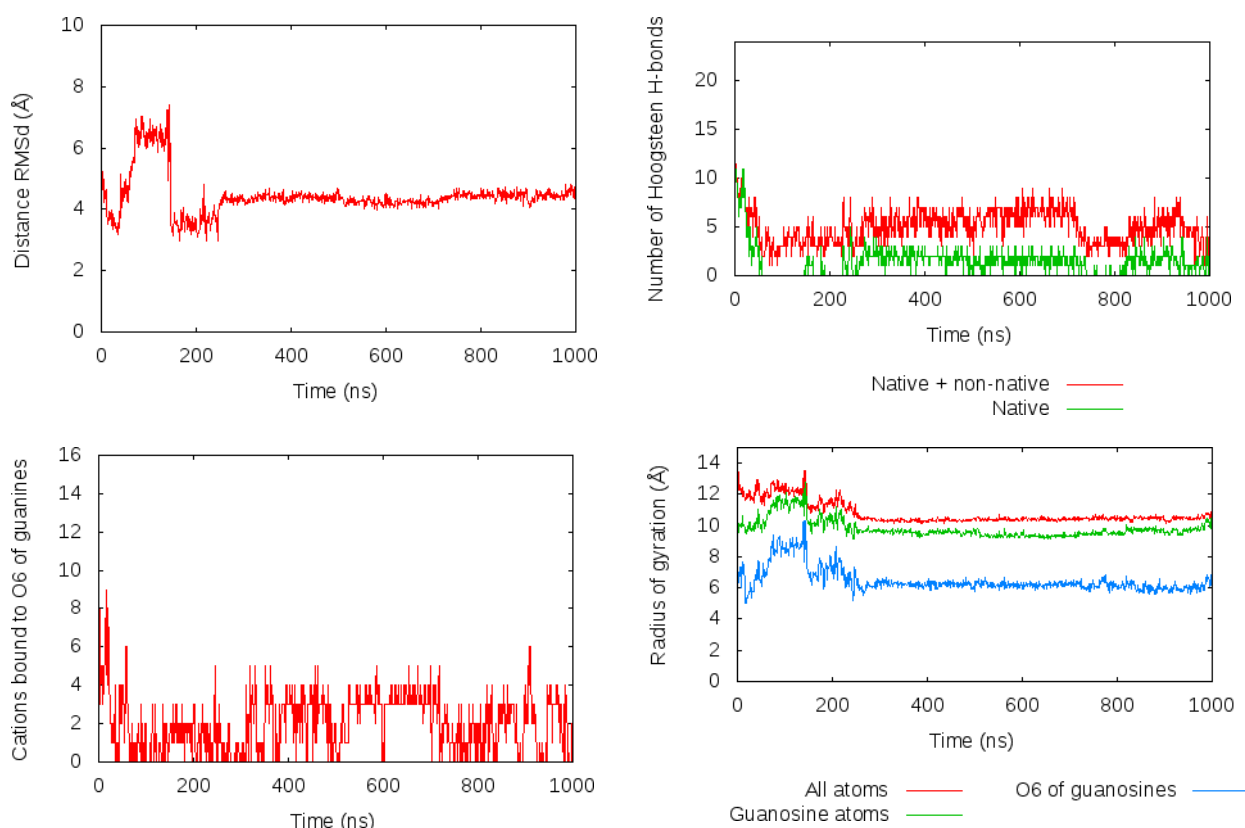

**Figure SA29.** Evolution of seven CVs in the simulation 2JSM-E. Top left: C4' distance RMSd with respect to the native structure 2JSM. Top right: Total number of native *c*WH G-G hydrogen bonds and total number of all *c*WH G-G hydrogen bonds. Bottom left: Total number of cation-G(O6) contacts. Bottom right: Radius of gyration of all atoms, all guanosine atoms, and G(O6) atoms only.



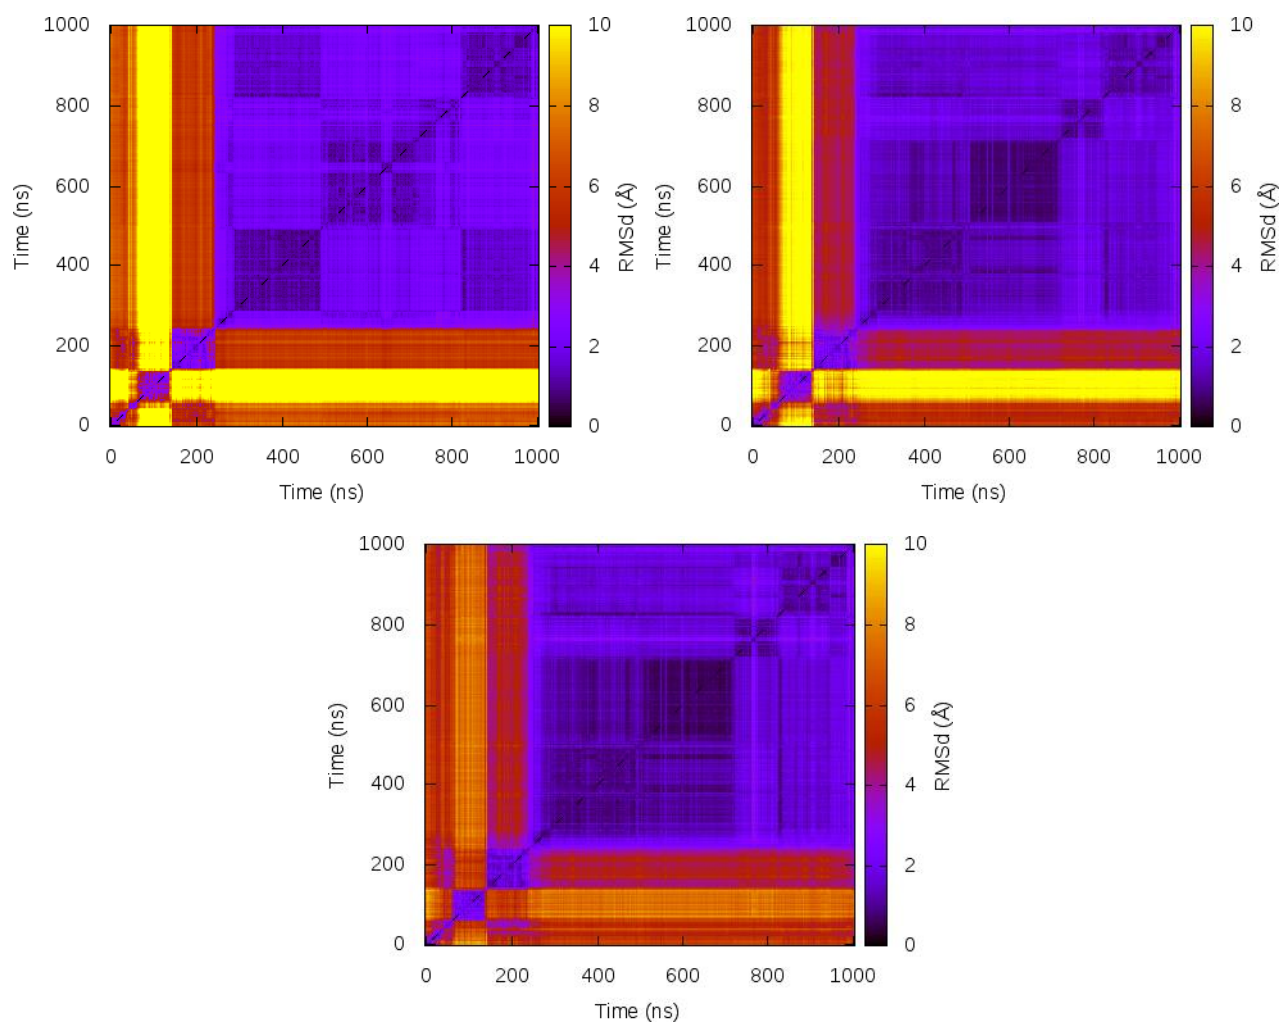

**Figure SA30.** 2D RMSd plots of structures in the simulation 2JSM-E. Top left: All-atom mass-weighted RMSd. Top right: All-guanosines-all-atom mass-weighted RMSd. Bottom: All-guanosines O6 RMSd.

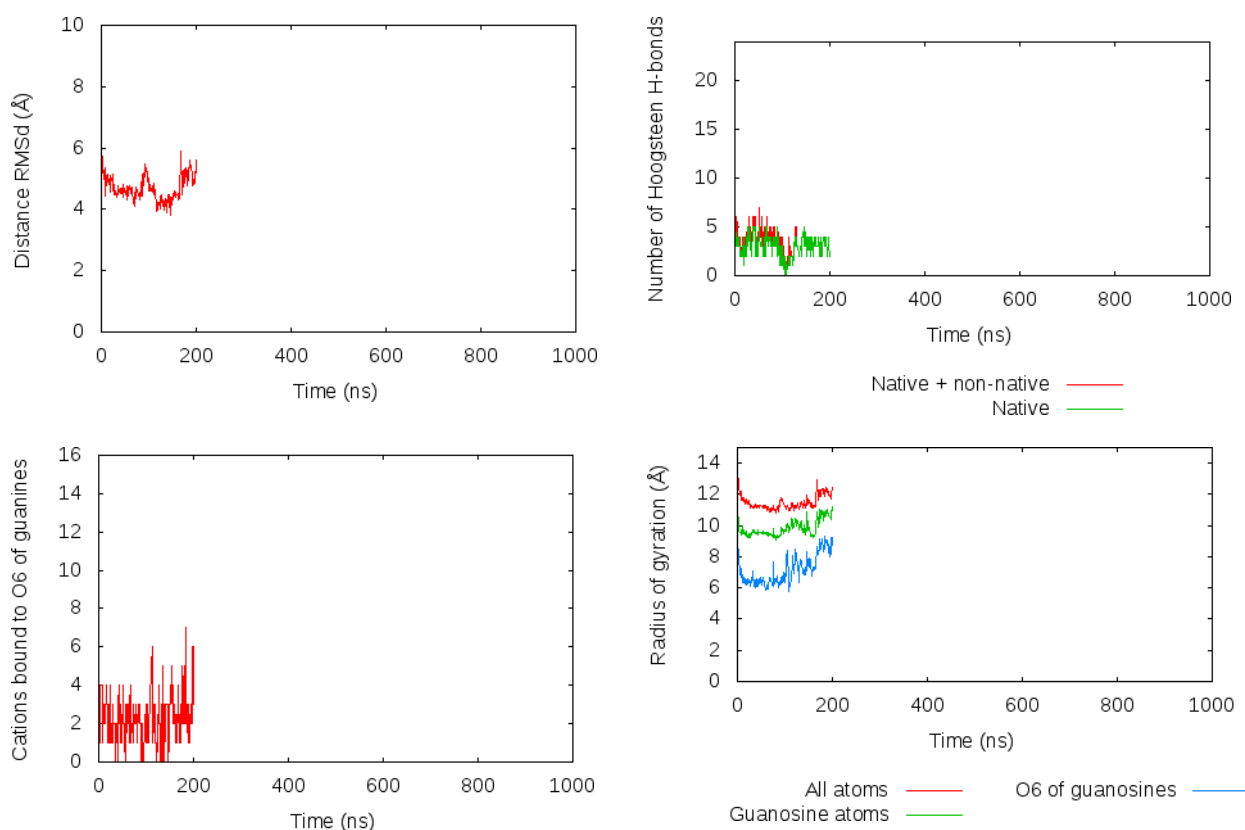

**Figure SA31.** Evolution of seven CVs in the simulation 2JSM-F. Top left: C4' distance RMSd with respect to the native structure 2JSM. Top right: Total number of native *c*WH G-G hydrogen bonds and total number of all *c*WH G-G hydrogen bonds. Bottom left: Total number of cation-G(O6) contacts. Bottom right: Radius of gyration of all atoms, all guanosine atoms, and G(O6) atoms only.

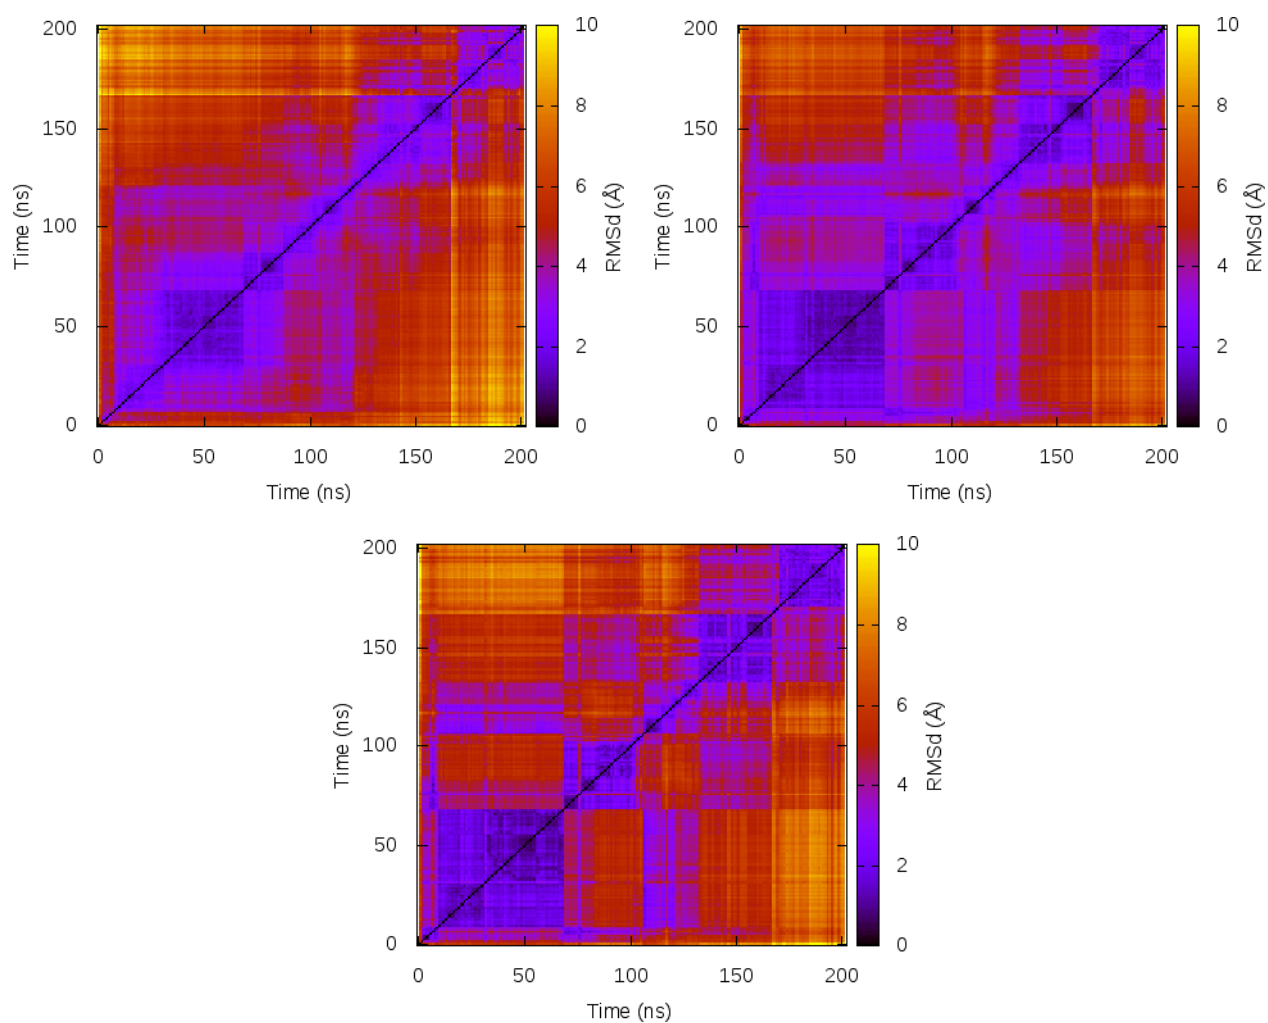

**Figure SA32.** 2D RMSd plots of structures in the simulation 2JSM-F. Top left: All-atom mass-weighted RMSd. Top right: All-guanosines-all-atom mass-weighted RMSd. Bottom: All-guanosines O6 RMSd.

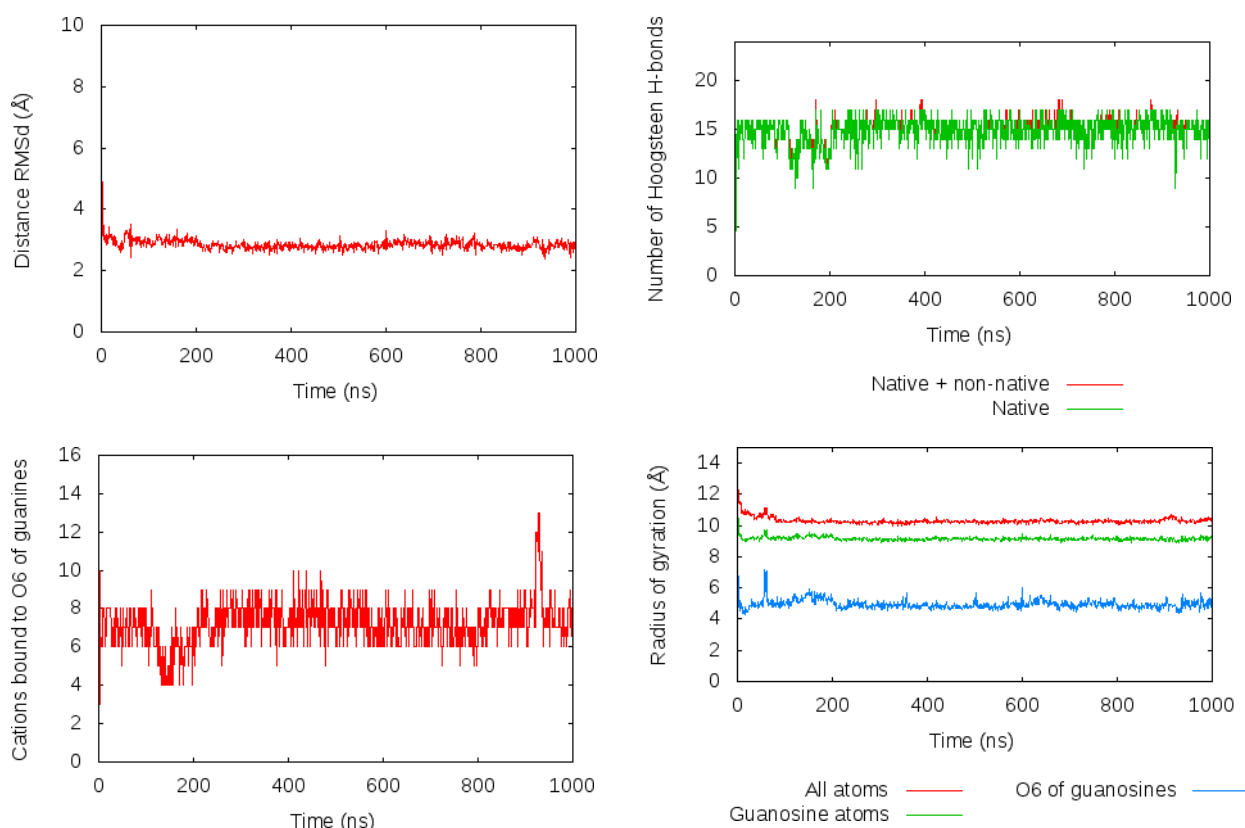

**Figure SA33.** Evolution of seven CVs in the simulation 2KF8-A. Top left: C4' distance RMSd with respect to the native structure 2KF8. Top right: Total number of native *c*WH G-G hydrogen bonds and total number of all *c*WH G-G hydrogen bonds. Bottom left: Total number of cation-G(O6) contacts. Bottom right: Radius of gyration of all atoms, all guanosine atoms, and G(O6) atoms only.

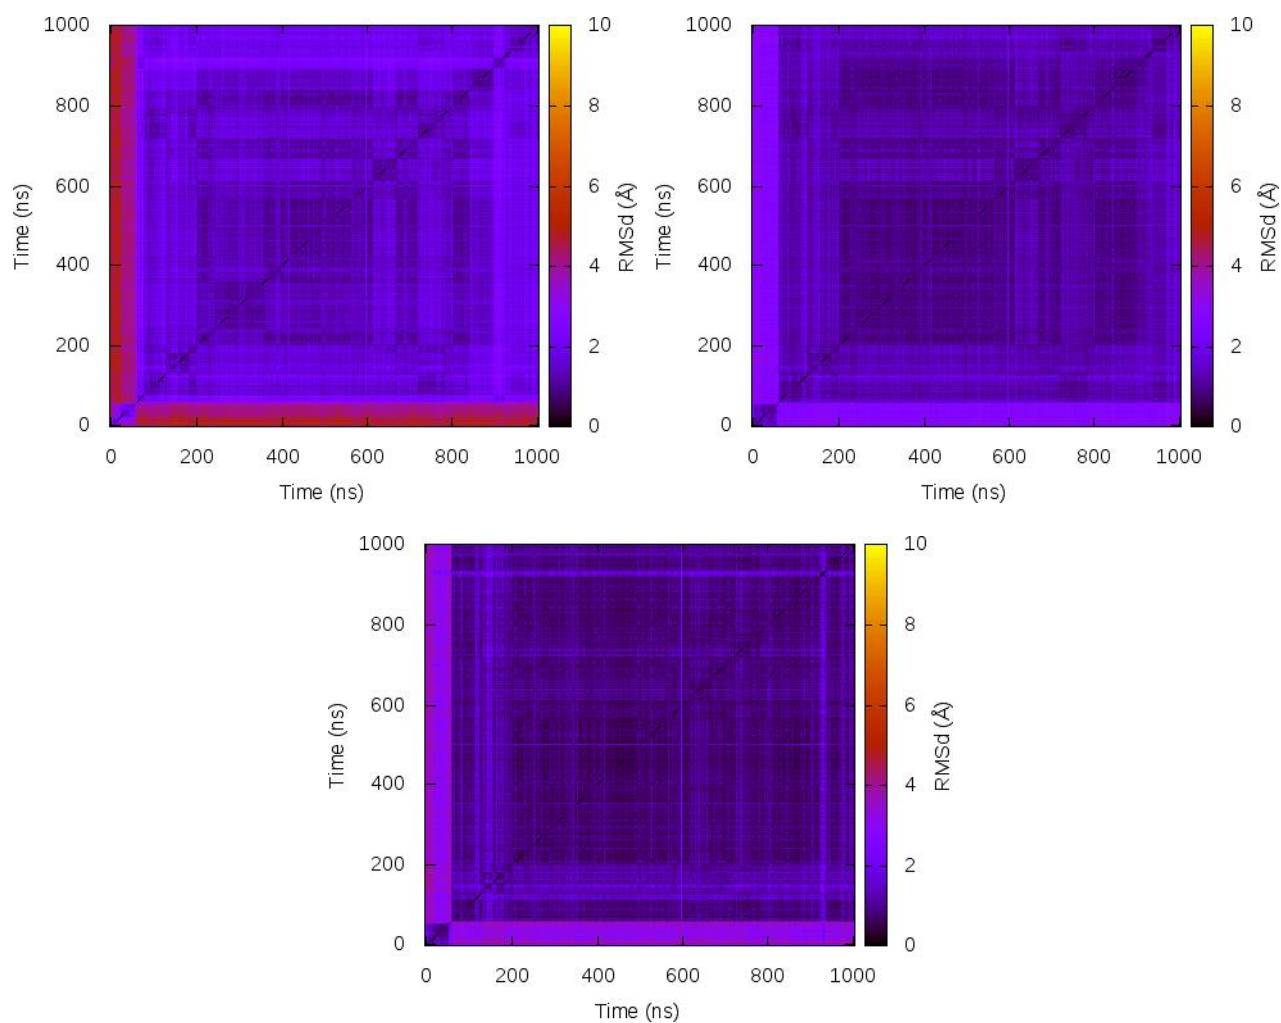

**Figure SA34.** 2D RMSd plots of structures in the simulation 2KF8-A. Top left: All-atom mass-weighted RMSd. Top right: All-guanosines-all-atom mass-weighted RMSd. Bottom: All-guanosines O6 RMSd.

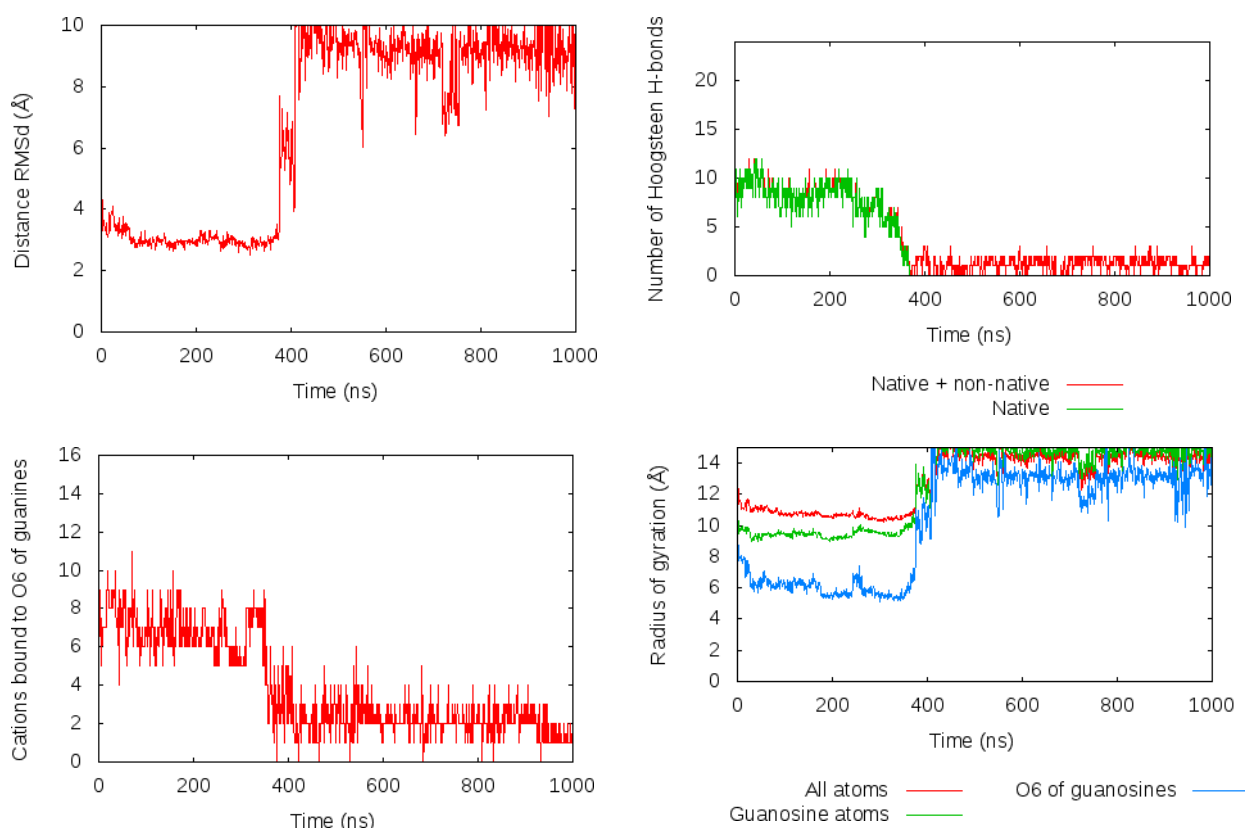

**Figure SA35.** Evolution of seven CVs in the simulation 2KF8-B. Top left: C4' distance RMSd with respect to the native structure 2KF8. Top right: Total number of native *c*WH G-G hydrogen bonds and total number of all *c*WH G-G hydrogen bonds. Bottom left: Total number of cation-G(O6) contacts. Bottom right: Radius of gyration of all atoms, all guanosine atoms, and G(O6) atoms only.

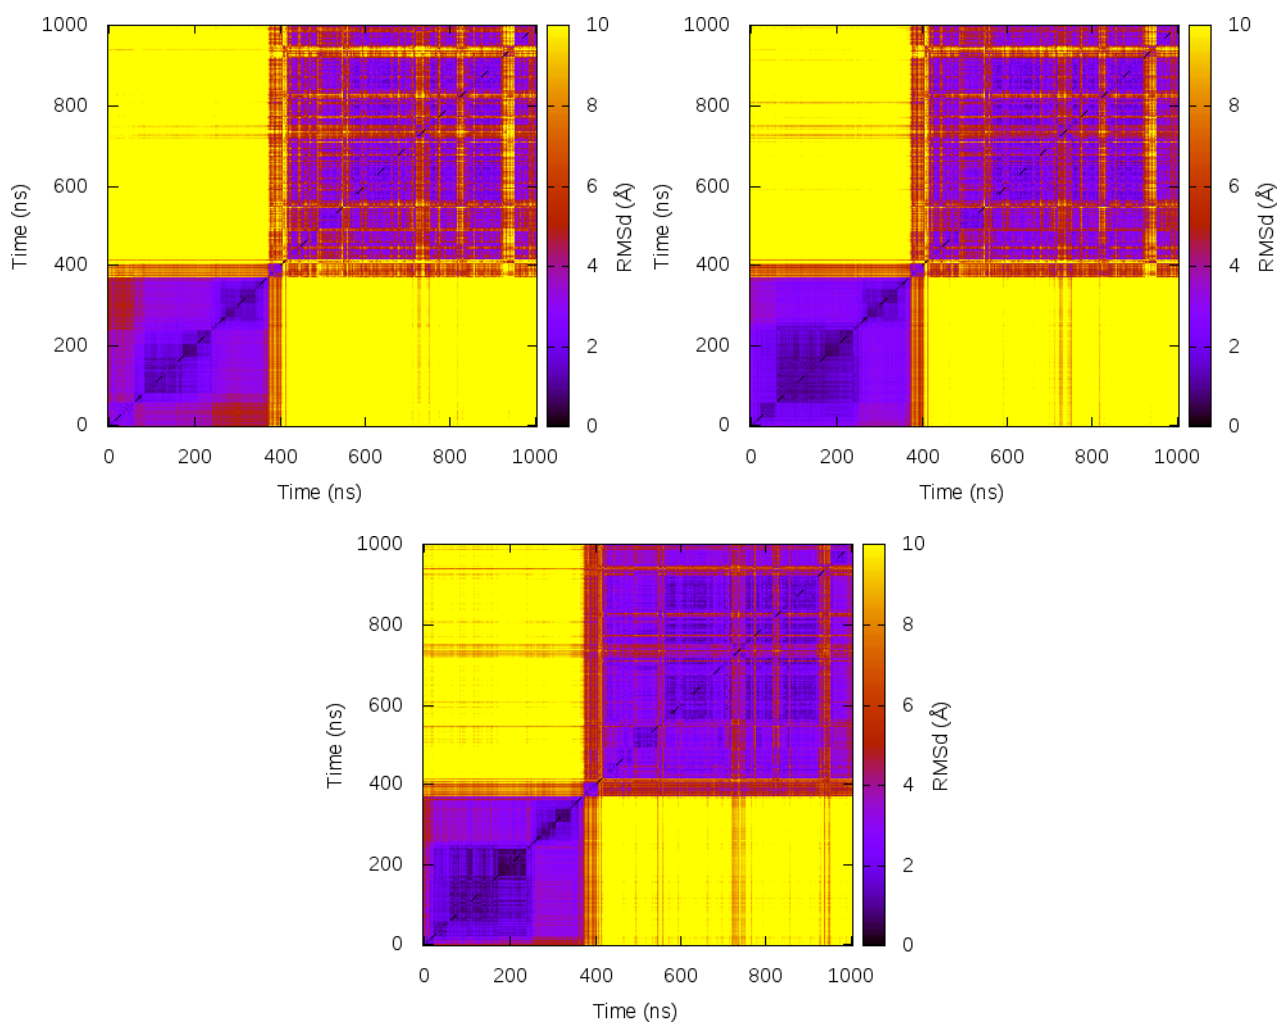

**Figure SA36.** 2D RMSd plots of structures in the simulation 2KF8-B. Top left: All-atom mass-weighted RMSd. Top right: All-guanosines-all-atom mass-weighted RMSd. Bottom: All-guanosines O6 RMSd.



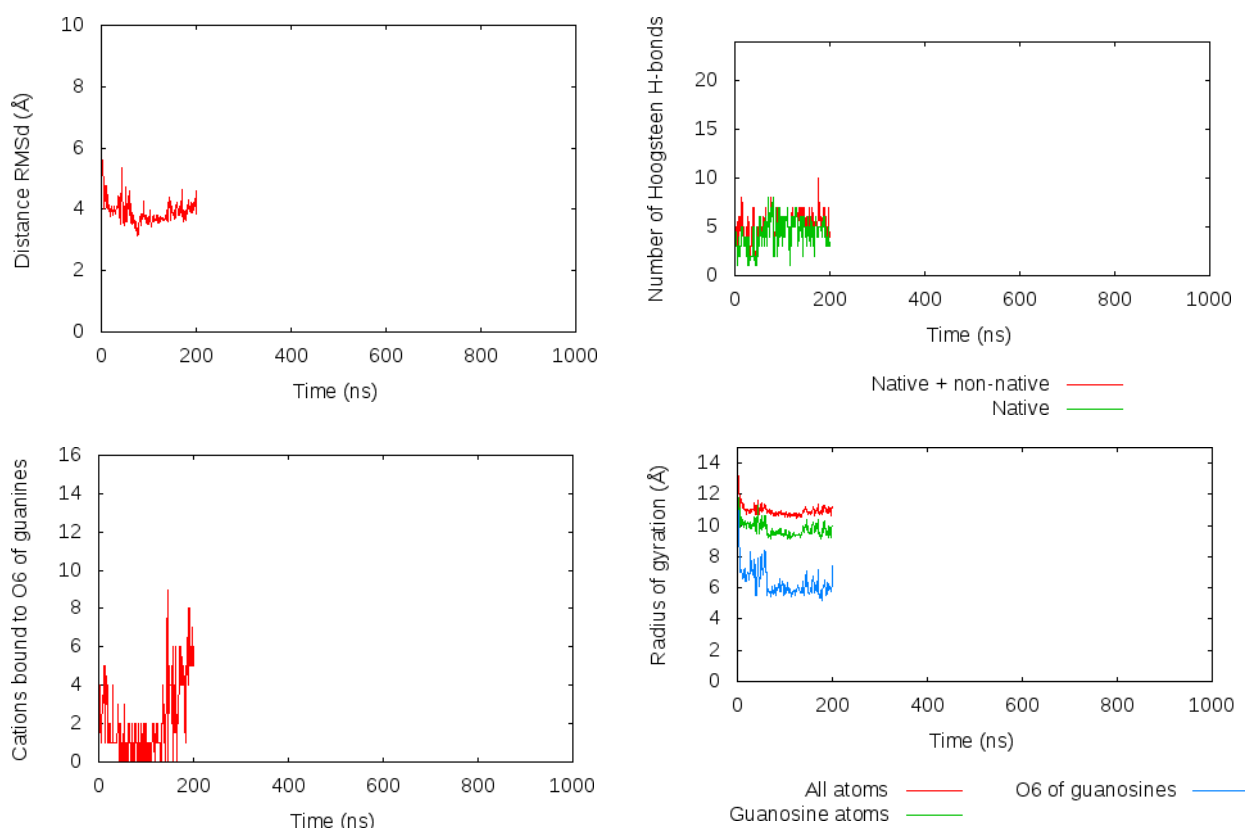

**Figure SA37.** Evolution of seven CVs in the simulation 2KF8-C. Top left: C4' distance RMSd with respect to the native structure 2KF8. Top right: Total number of native *c*WH G-G hydrogen bonds and total number of all *c*WH G-G hydrogen bonds. Bottom left: Total number of cation-G(O6) contacts. Bottom right: Radius of gyration of all atoms, all guanosine atoms, and G(O6) atoms only.

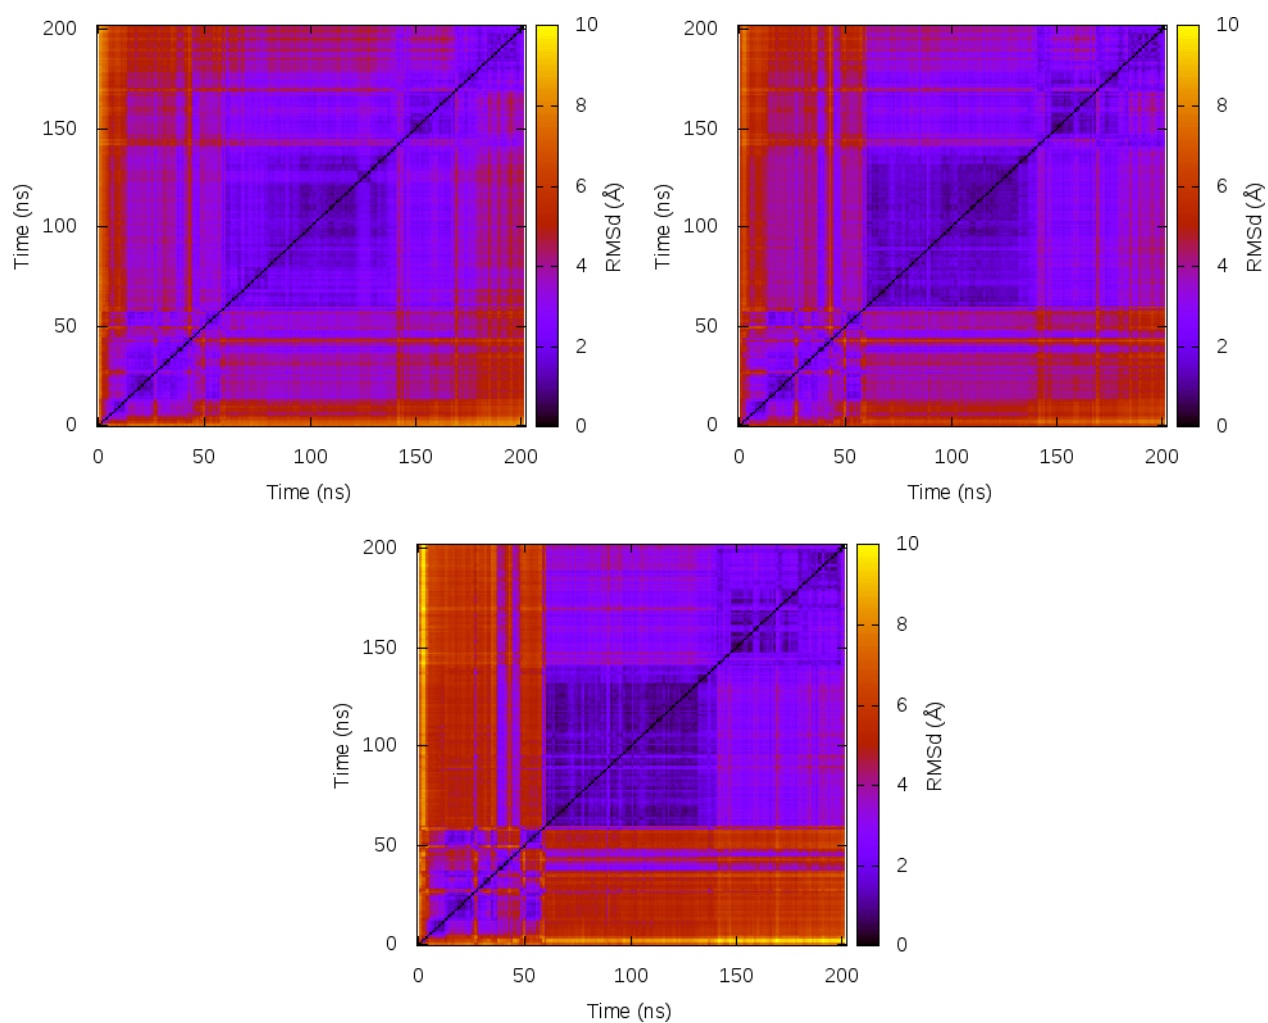

**Figure SA38.** 2D RMSd plots of structures in the simulation 2KF8-C. Top left: All-atom mass-weighted RMSd. Top right: All-guanosines-all-atom mass-weighted RMSd. Bottom: All-guanosines O6 RMSd.

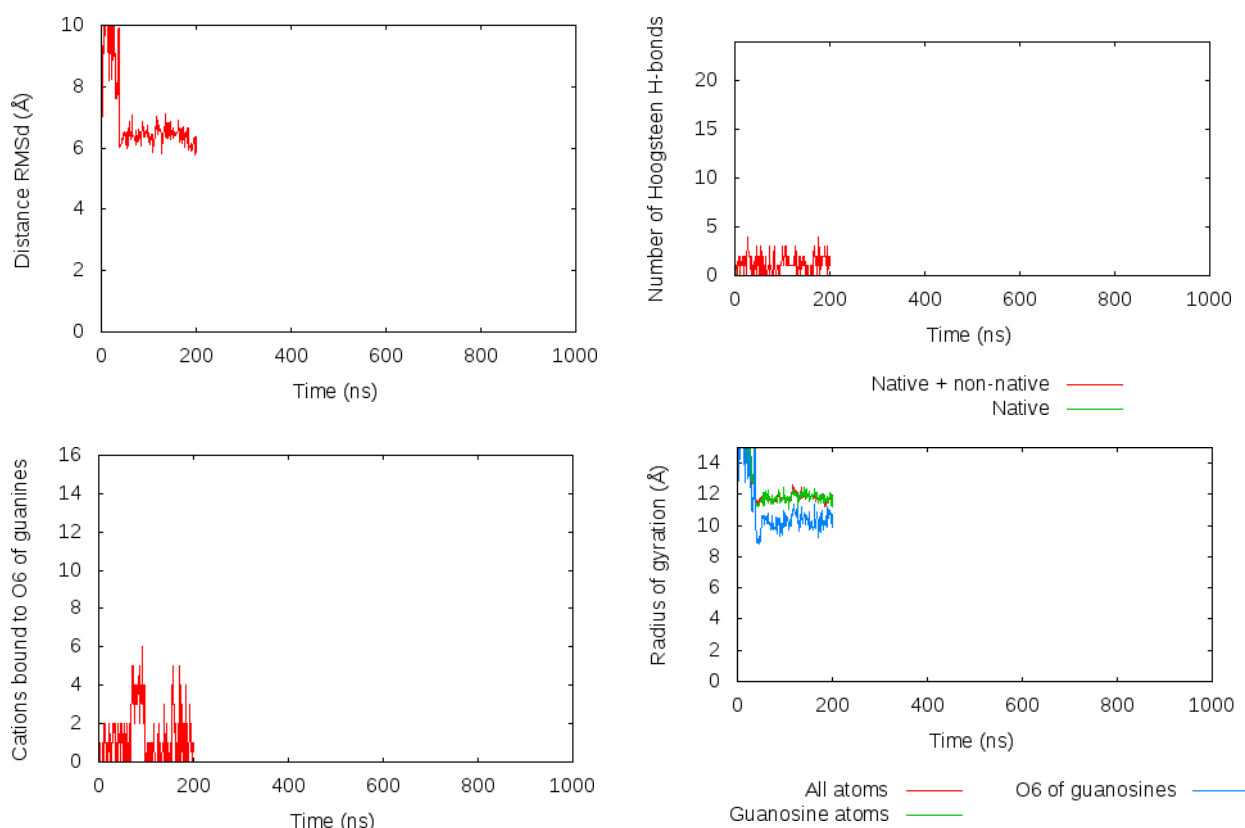

**Figure SA39.** Evolution of seven CVs in the simulation 2KF8-D. Top left: C4' distance RMSd with respect to the native structure 2KF8. Top right: Total number of native *c*WH G-G hydrogen bonds and total number of all *c*WH G-G hydrogen bonds. Bottom left: Total number of cation-G(O6) contacts. Bottom right: Radius of gyration of all atoms, all guanosine atoms, and G(O6) atoms only.

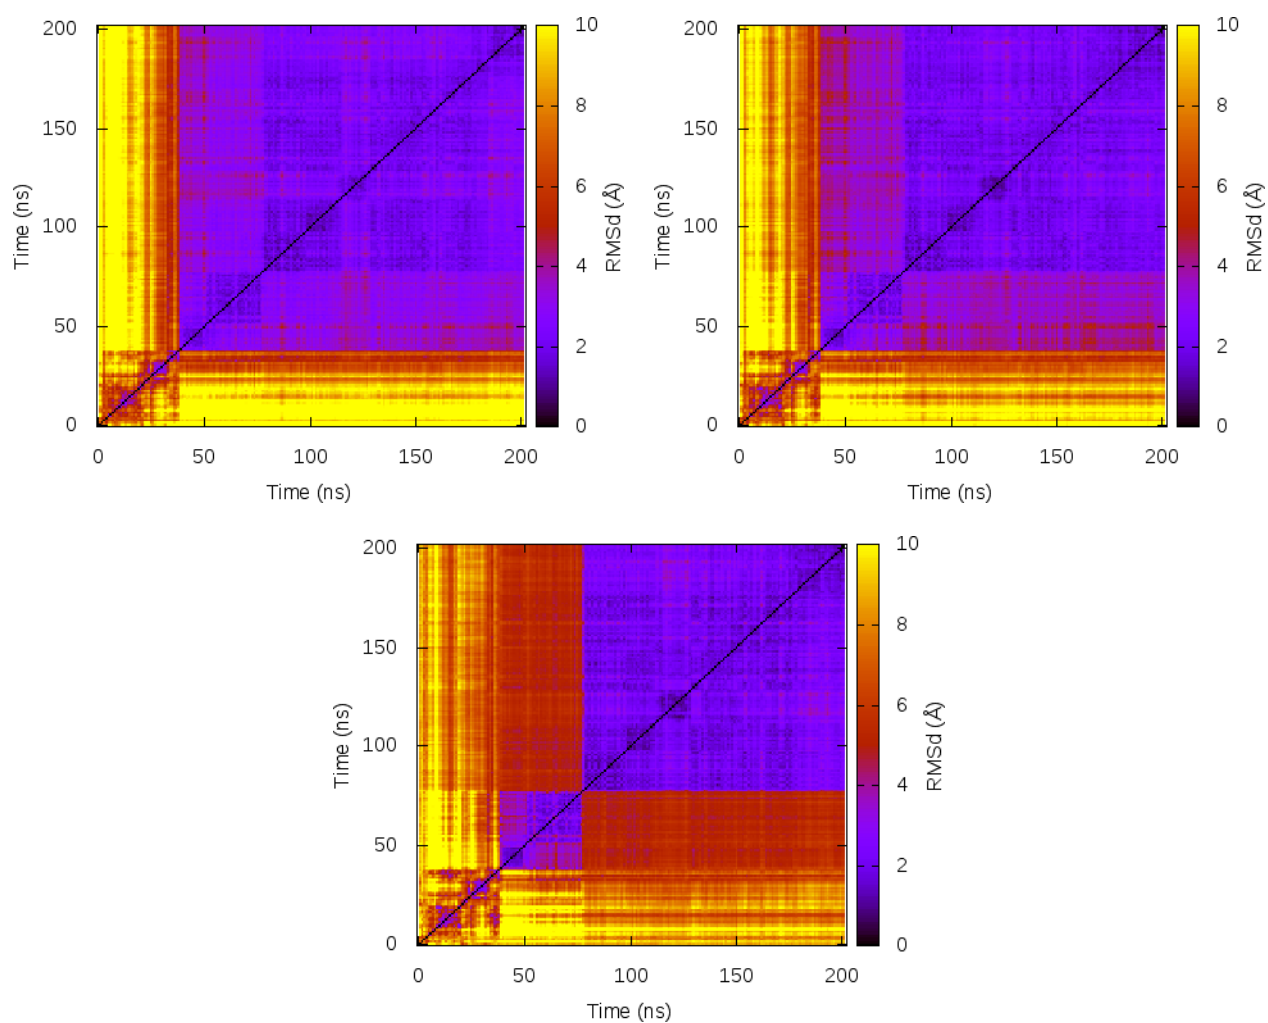

**Figure SA40.** 2D RMSd plots of structures in the simulation 2KF8-D. Top left: All-atom mass-weighted RMSd. Top right: All-guanosines-all-atom mass-weighted RMSd. Bottom: All-guanosines O6 RMSd.

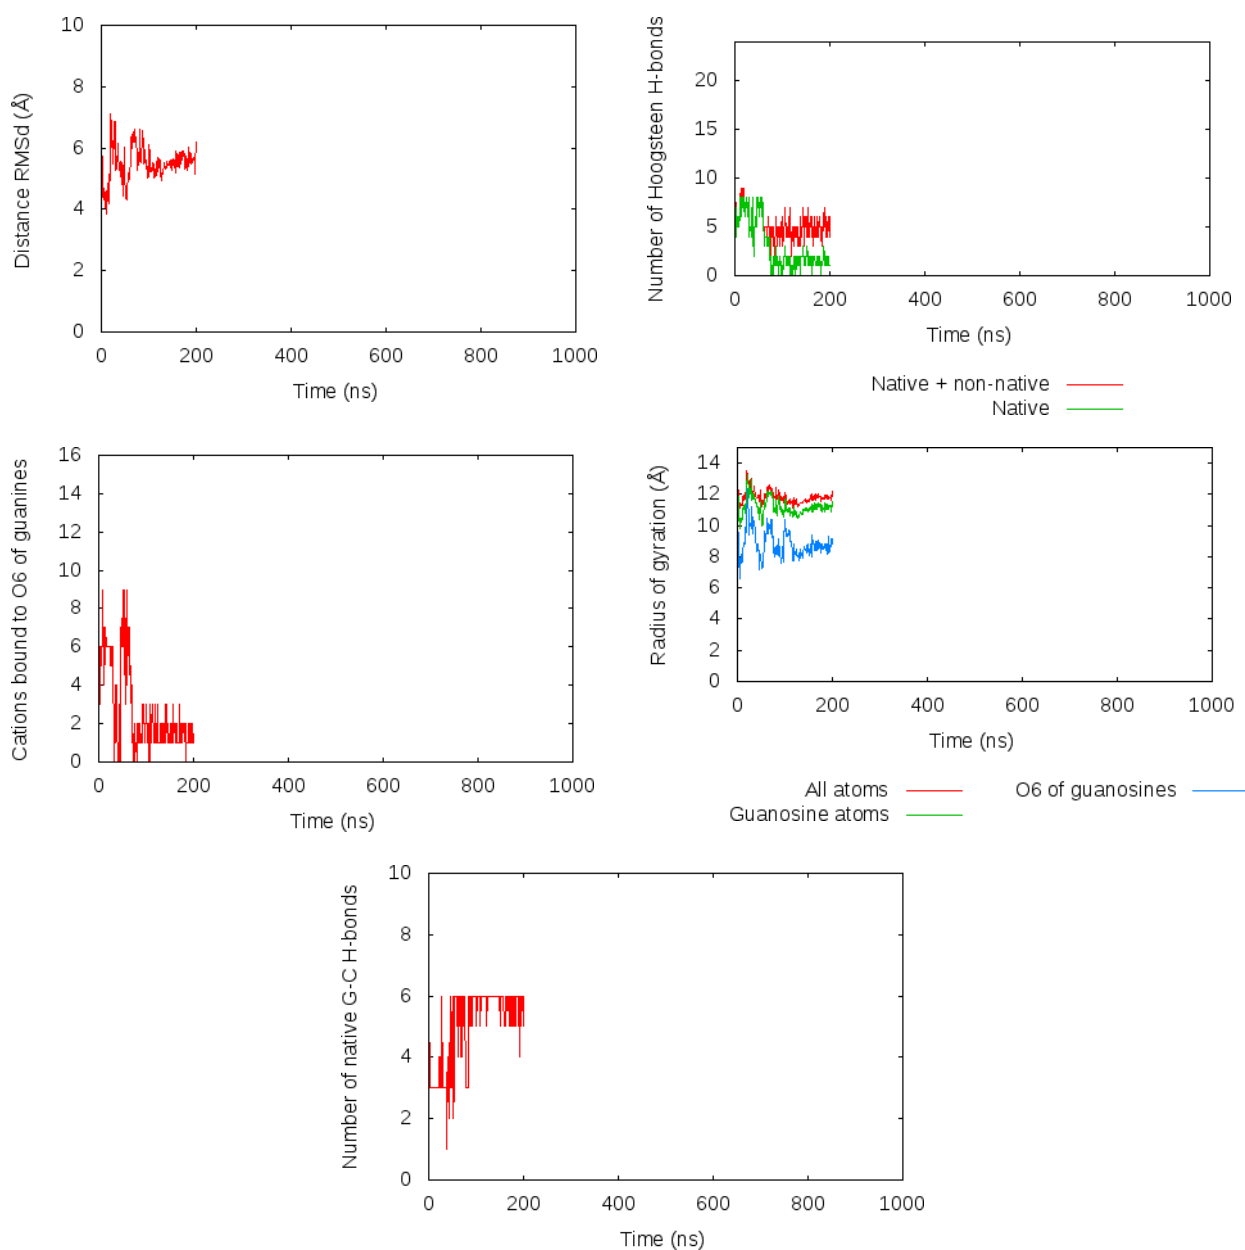

**Figure SA41.** Evolution of eight CVs in the simulation 2KM3-A. Top left: C4' distance RMSd with respect to the native structure 2KM3. Top right: Total number of native *c*WH G-G hydrogen bonds and total number of all *c*WH G-G hydrogen bonds. Middle left: Total number of cation-G(O6) contacts. Middle right: Radius of gyration of all atoms, all guanosine atoms, and G(O6) atoms only. Bottom: Total number of native *c*WW G-C hydrogen bonds.

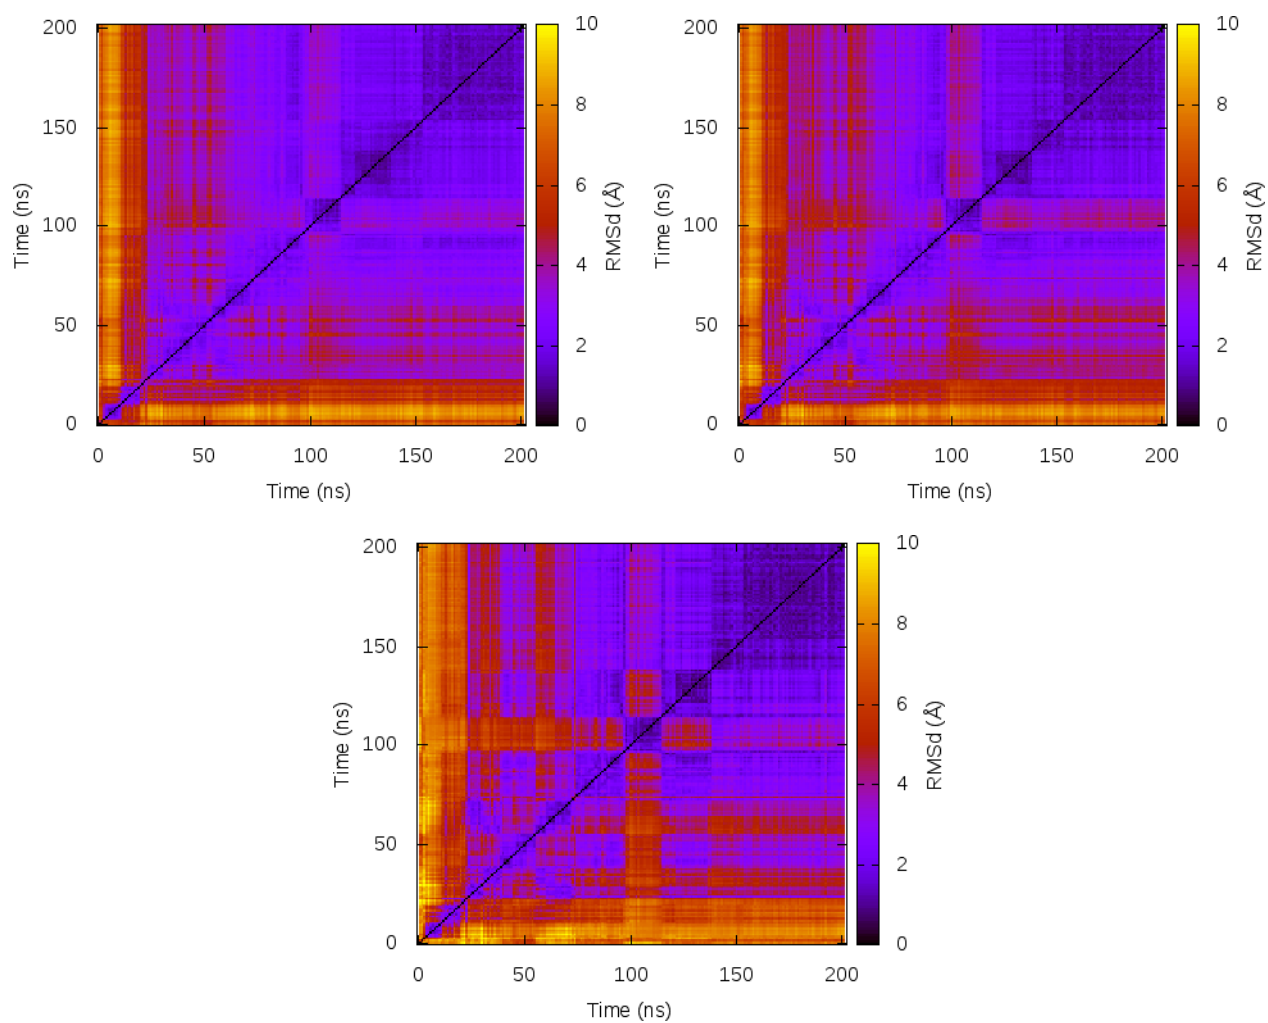

**Figure SA42.** 2D RMSd plots of structures in the simulation 2KM3-A. Top left: All-atom mass-weighted RMSd. Top right: All-guanosines-all-atom mass-weighted RMSd. Bottom: All-guanosines O6 RMSd.

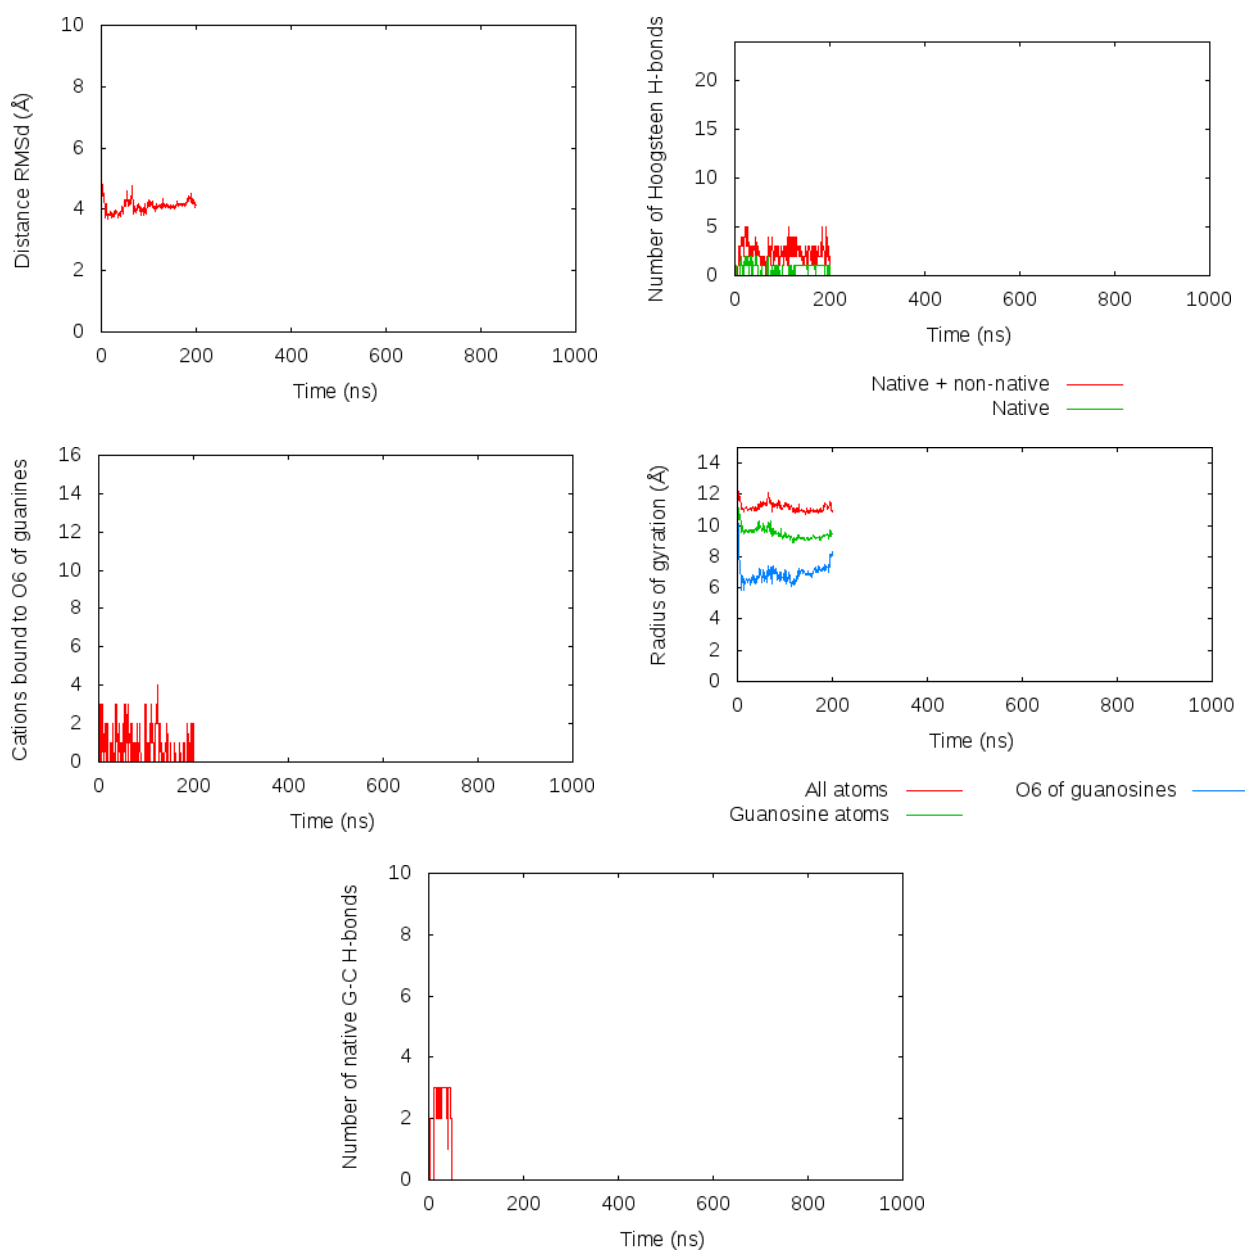

**Figure SA43.** Evolution of eight CVs in the simulation 2KM3-B. Top left: C4' distance RMSd with respect to the native structure 2KM3. Top right: Total number of native *c*WH G-G hydrogen bonds and total number of all *c*WH G-G hydrogen bonds. Middle left: Total number of cation-G(O6) contacts. Middle right: Radius of gyration of all atoms, all guanosine atoms, and G(O6) atoms only. Bottom: Total number of native *c*WW G-C hydrogen bonds.

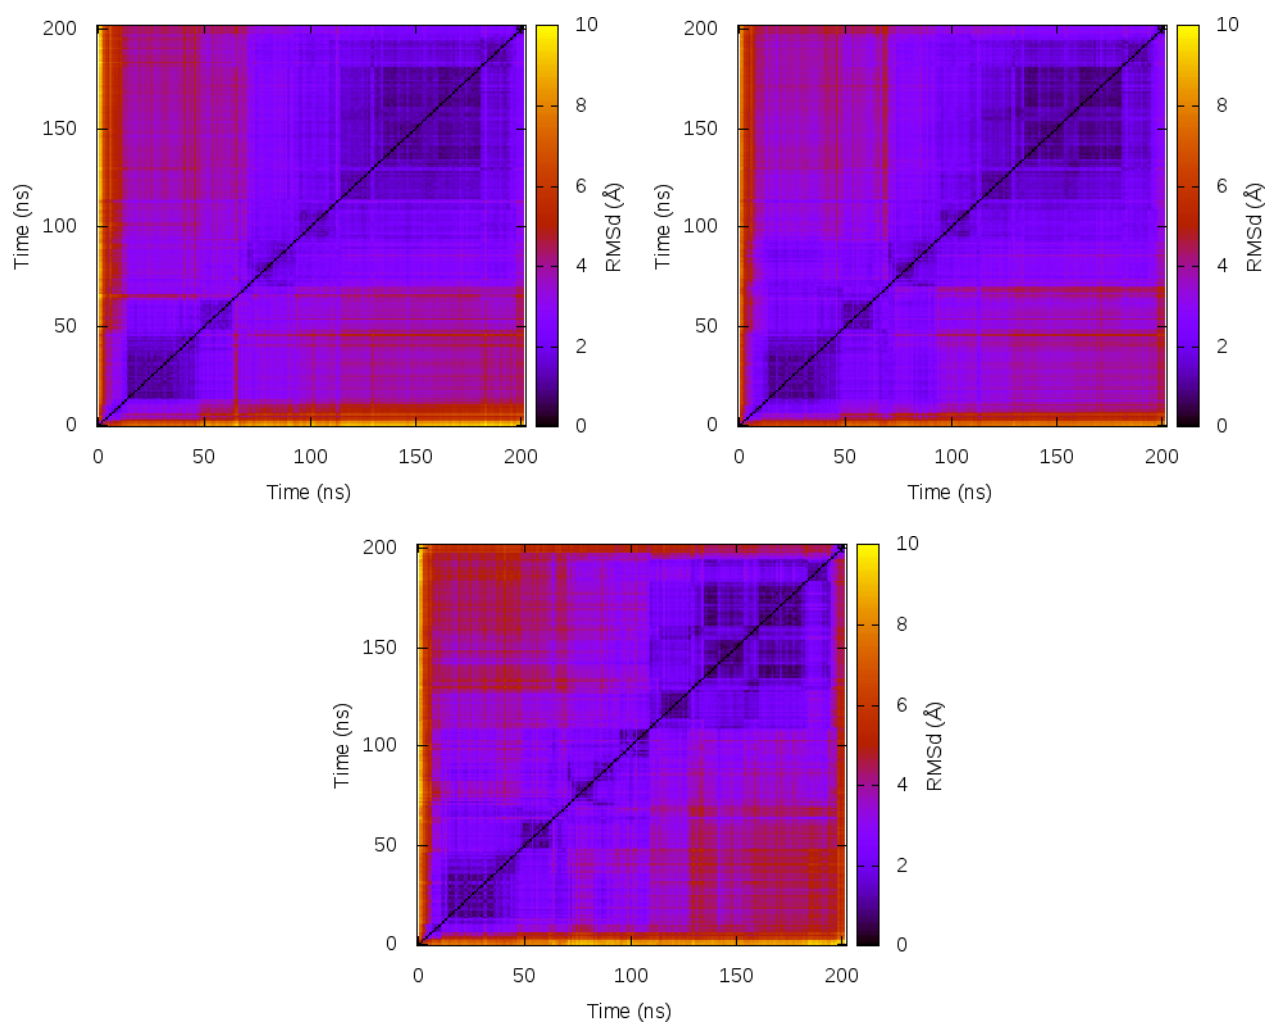

**Figure SA44.** 2D RMSd plots of structures in the simulation 2KM3-B. Top left: All-atom mass-weighted RMSd. Top right: All-guanosines-all-atom mass-weighted RMSd. Bottom: All-guanosines O6 RMSd.



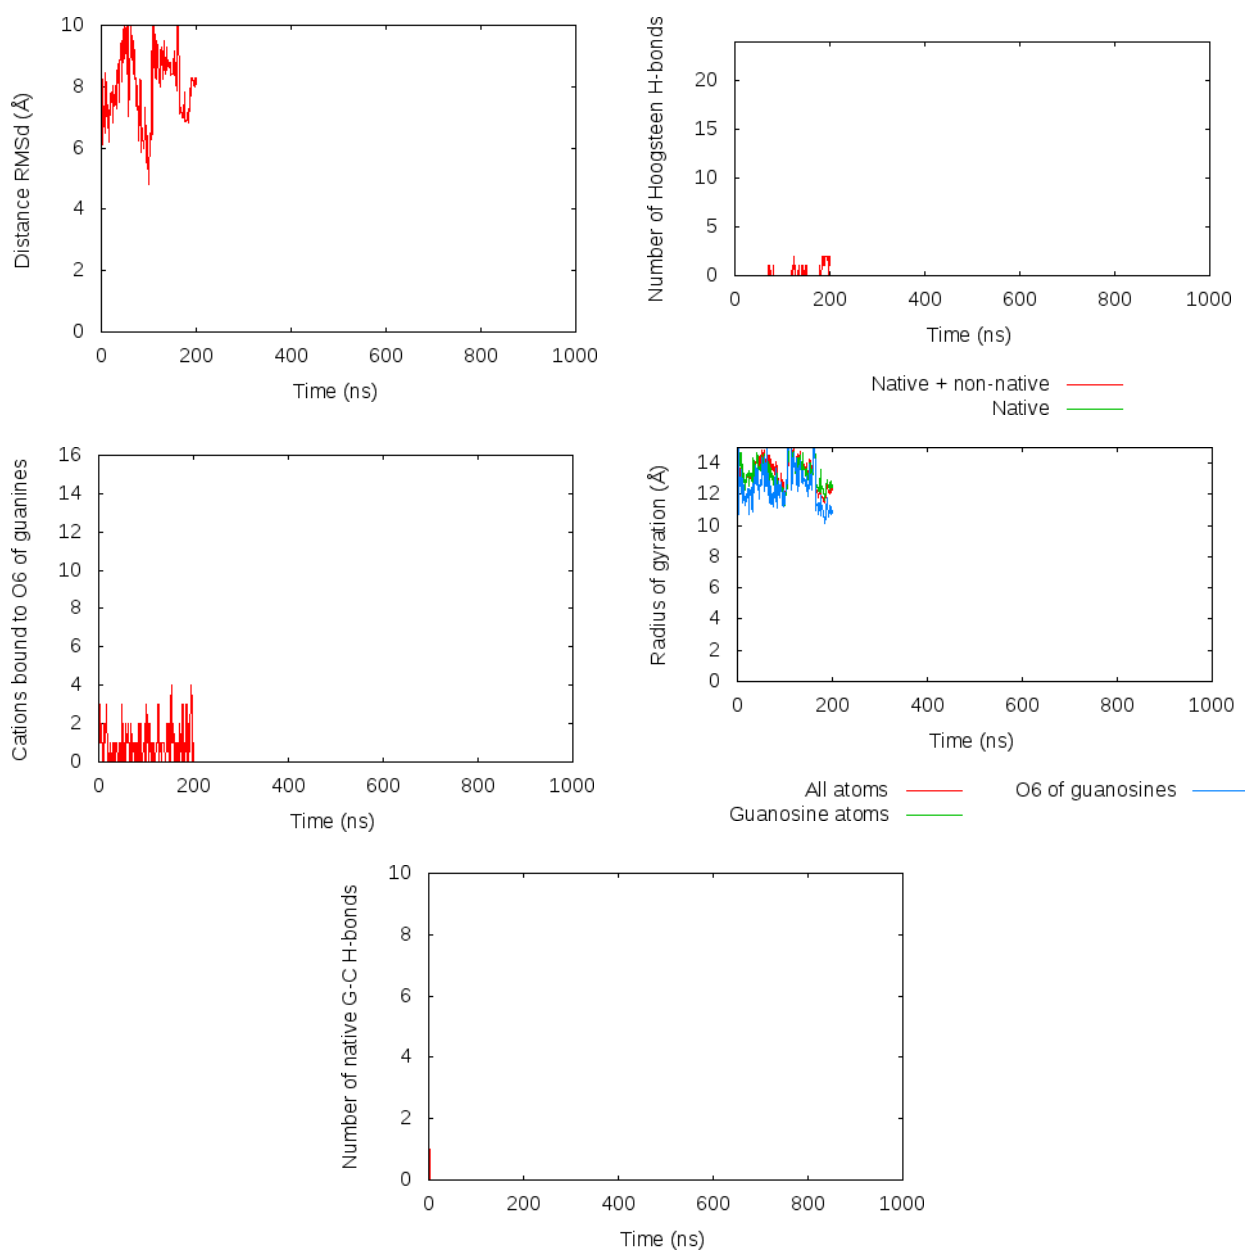

**Figure SA45.** Evolution of eight CVs in the simulation 2KM3-C. Top left: C4' distance RMSd with respect to the native structure 2KM3. Top right: Total number of native *c*WH G-G hydrogen bonds and total number of all *c*WH G-G hydrogen bonds. Middle left: Total number of cation-G(O6) contacts. Middle right: Radius of gyration of all atoms, all guanosine atoms, and G(O6) atoms only. Bottom: Total number of native *c*WW G-C hydrogen bonds.

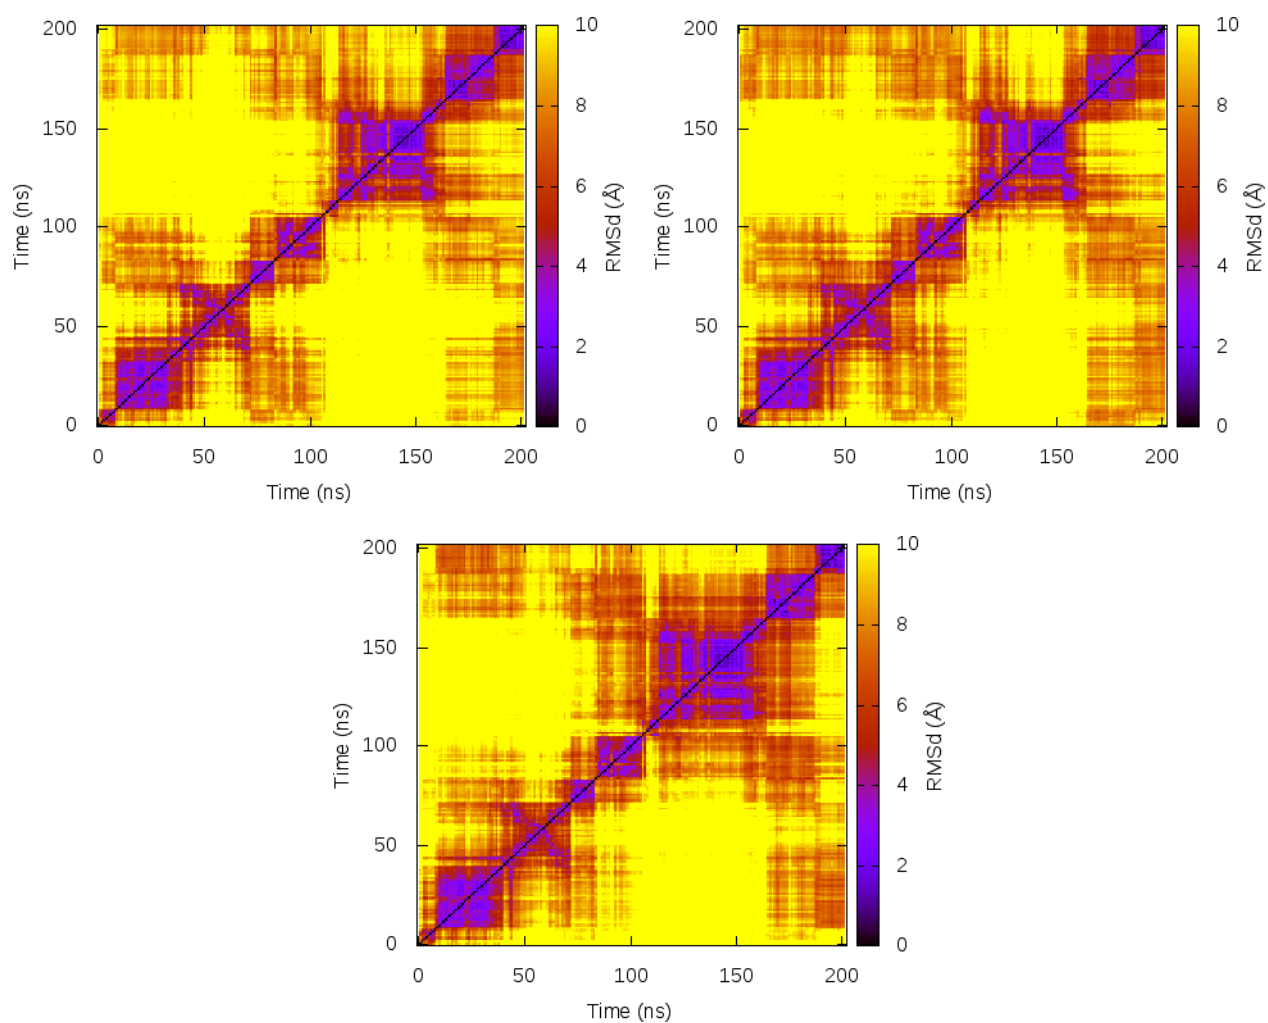

**Figure SA46.** 2D RMSd plots of structures in the simulation 2KM3-C. Top left: All-atom mass-weighted RMSd. Top right: All-guanosines-all-atom mass-weighted RMSd. Bottom: All-guanosines O6 RMSd.

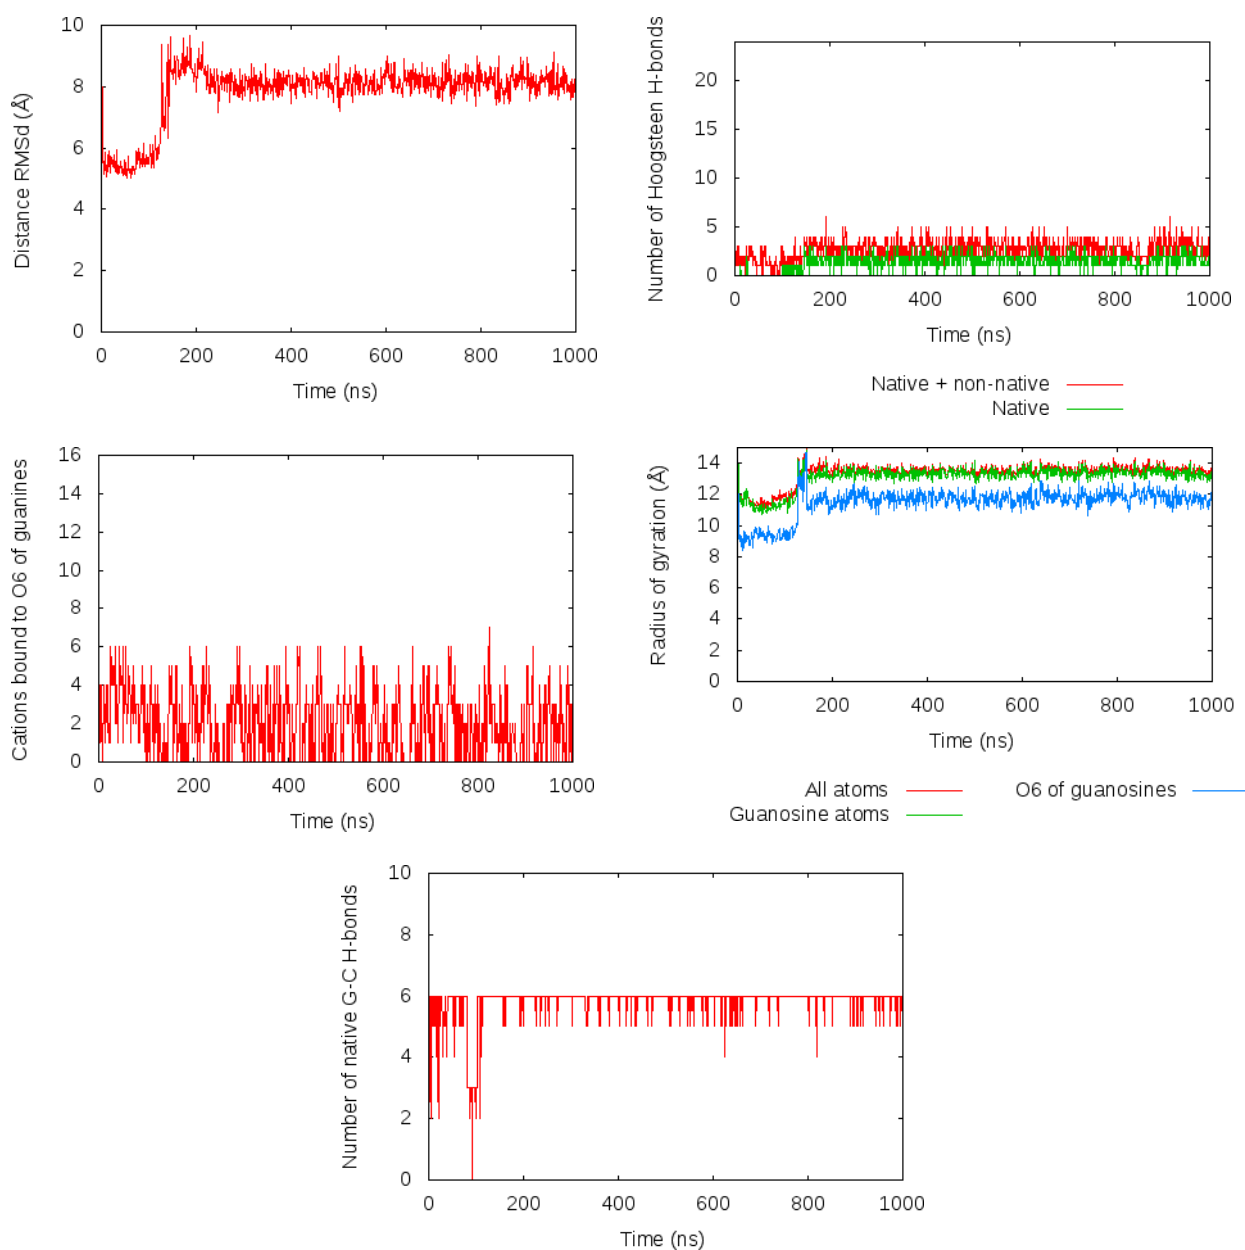

**Figure SA47.** Evolution of eight CVs in the simulation 2KM3-D. Top left: C4' distance RMSd with respect to the native structure 2KM3. Top right: Total number of native *c*WH G-G hydrogen bonds and total number of all *c*WH G-G hydrogen bonds. Middle left: Total number of cation-G(O6) contacts. Middle right: Radius of gyration of all atoms, all guanosine atoms, and G(O6) atoms only. Bottom: Total number of native *c*WW G-C hydrogen bonds.

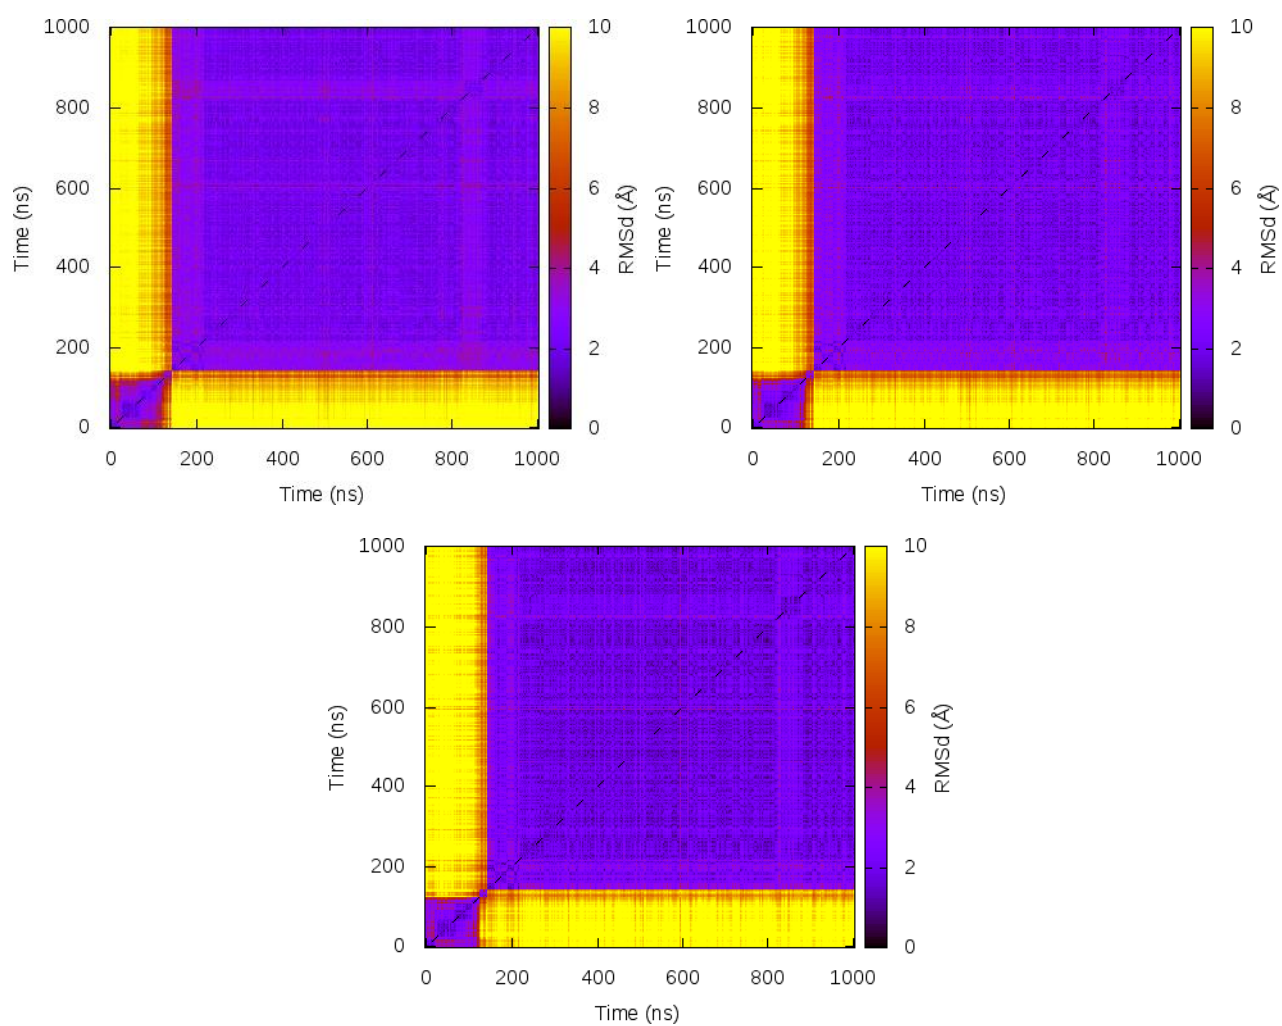

**Figure SA48.** 2D RMSd plots of structures in the simulation 2KM3-D. Top left: All-atom mass-weighted RMSd. Top right: All-guanosines-all-atom mass-weighted RMSd. Bottom: All-guanosines O6 RMSd.

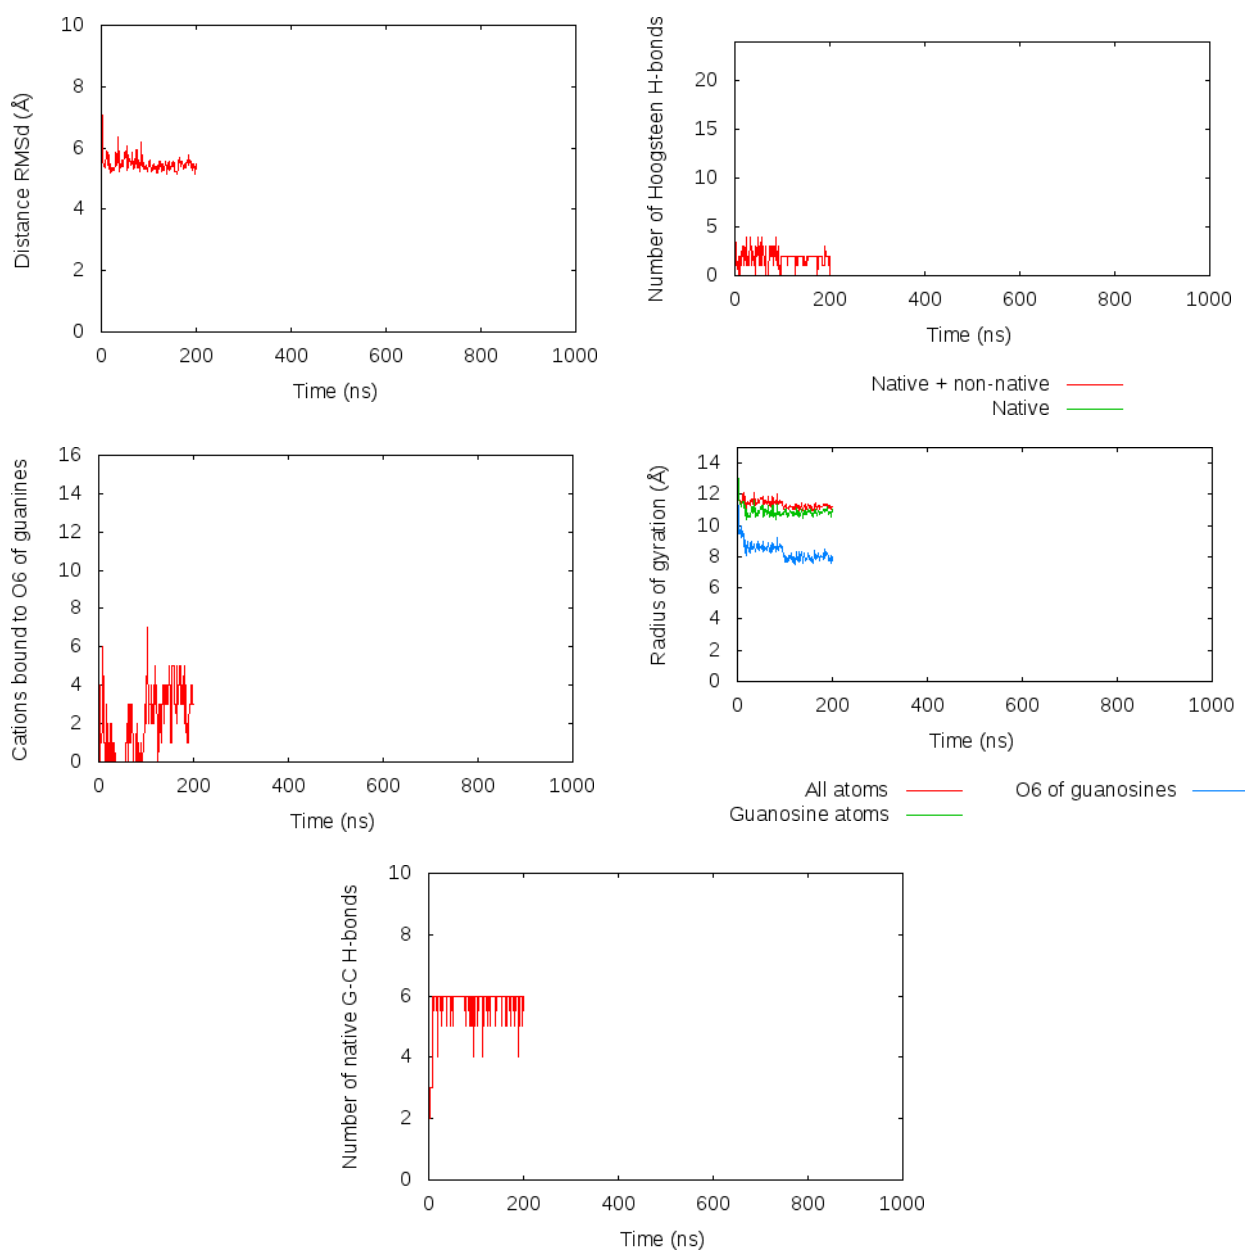

**Figure SA49.** Evolution of eight CVs in the simulation 2KM3-E. Top left: C4' distance RMSd with respect to the native structure 2KM3. Top right: Total number of native *c*WH G-G hydrogen bonds and total number of all *c*WH G-G hydrogen bonds. Middle left: Total number of cation-G(O6) contacts. Middle right: Radius of gyration of all atoms, all guanosine atoms, and G(O6) atoms only. Bottom: Total number of native *c*WW G-C hydrogen bonds.

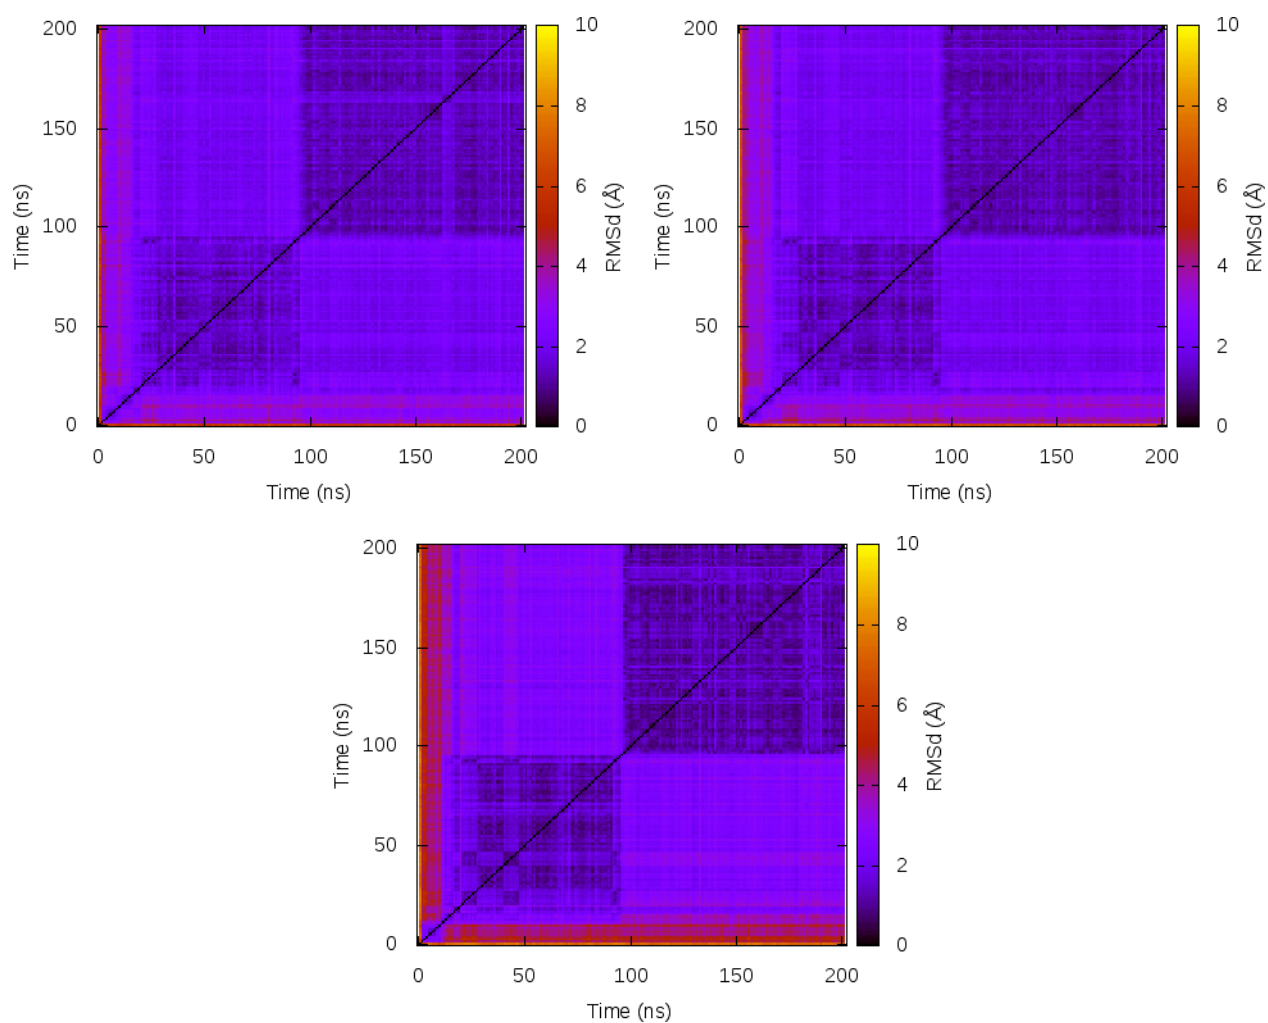

**Figure SA50.** 2D RMSd plots of structures in the simulation 2KM3-E. Top left: All-atom mass-weighted RMSd. Top right: All-guanosines-all-atom mass-weighted RMSd. Bottom: All-guanosines O6 RMSd.
